# Supplementary material for: Systematic comparison of five machine-learning methods in classification and interpolation of soil particle size fractions using different transformed data
Source: Copernicus journal article supplement (doi:10.5194/hess-2019-648), 2020-01-06
Supplement: Supplementary file [file hess-2019-648-AC2-supplement.pdf]

## Response to comments

Dear Anonymous Referee #2,

Thank you for your constructive comments and suggestions concerning our manuscript entitled “Systematic comparison of five machine-learning methods in classification and interpolation of soil particle size fractions using different transformed data”. Those comments and suggestions are all valuable and very helpful for revising and improving our paper, as well as the important guiding significance to our researches. We have studied comments carefully and have made correction which we hope meet with approval. Revised portion are marked in the manuscript. The main corrections in the manuscript and the responds to the reviewer’s comments are as follows.

### 10 **Referee’s comments**

**I went through the manuscript submitted by the authors. Compared to previous versions of the manuscript appeared online, I appreciate the final discussion on the methods being used, particularly on the strengths and weaknesses of the compositional transformations as well as on the limitations of the not-transformed approach being used in the analysis.**

15 **Although the discussion is overall well-done, I believe that the manuscript would benefit from a clarification on the approach of analysis included earlier in the manuscript (with particular focus on the way methods are used). In Section 2.4.6 the authors should more clearly state that all the methods will be used separately on the components. Setting apart the issue on the appropriateness of the methods, I believe that a clear statement on the approach used and on the limitations of the presented study would provide a fair setting for the presentation of the interesting results presented**  
20 **by the authors, making the reader aware from the very beginning on the boundaries of usability of the presented analysis.**

**Comment 1, clearly states that the methods will be applied independently on the components, before the presentation of the results (e.g., in the section on methods); this should be also better clarified in the supplement.**

25 **Response:** Thanks for the referee’s suggestion. We agreed that the independent modeling should be clarified, and the parameter adjustment of each component was also independent. We have added the descriptions of the independent parameter adjustment and modeling in Section 2.4.6, and clarified in detail in the Supplementary Material Section S2 “Parameter adjustment and modeling of machine-learning methods”.

30 **P8L26** *“All the methods were applied independently on these 11 components (Table S2.1). The equation description of five machine-learning methods can be found in the Supplementary Section S1. More details about parameters optimization and independent modeling were demonstrated in the Supplementary Section S2.”*

## Supplementary Material Section S2 ‘Parameter adjustment and modeling of machine-learning methods’

‘For the parameter adjustment in Table S2.1, all variables (i.e., “sand, silt, clay, ilr1, ilr2, alr1, alr2, clr1, clr2, clr3” for regression and “class” for classification) were trained independently to define the best-performance parameter combination of each machine-learning method using R packages mentioned in Section 2.4.6 ‘Parameters optimization’. Accuracy indicators (e.g., RMSEs) were based on Aitchison space and Euclidean space for the original data and log ratio transformed data, respectively. For KNN, the kmax was 15; the distance was 1; the kernel was rectangular. For MLP, the size ranged between 5 and 10. For RF, the ntree was 1000; the mtry fluctuated from 9 to 11. For SVM, the gamma was 0.01; the cost was 1. For XGB, the max\_depth was 3 – 4; the eta was 0.05 – 0.1; the colsample\_bytree was 0.6 – 0.8, the nrounds was 30; the subsample was 0.8 – 1; the gamma was 0 – 0.4; the min\_child\_weight was 0.6 – 0.8.’

10

‘For the independent modeling of soil PSFs interpolation, each component in Table S2.1 was trained separately using five machine-learning methods except for ‘class’. For the original method, three components, ‘sand’, ‘silt’ and ‘clay’ were applied separately to machine-learning methods with their own parameters. For log ratio methods, 7 components were also applied separately, then the results of three log ratio methods were back-transformed. (alr1 and alr2 for ALR method, clr1, clr2, clr3 for CLR method, and ilr1, ilr2 for ILR methods).’

15

**Comment 2, discuss from the very beginning that the range of applicability of the study is limited to this type of modeling (component-wise), whereas a joint modeling could lead to different results.**

**Response:** Thanks for the referee’s suggestion. We have added the limitation to this problem in the discussion section 4.1 “The systematic comparison of the five machine-learning models”.

20

**P25L1** “The range of applicability of the study is limited to independent modeling, i.e., the component-wise approaches. However, joint fractions modeling could lead to different results.”

**Comment 3, mention which of the methods being compared could be also used to build a joint regression model for the psf; this would better contextualize the modeling choice of the authors, as well as the limitations of the study. On the latter regard, I believe that the following methods could be also easily applied to multivariate vectors: KNN, Multilayer perceptron neural network, Random Forest, Support vector machine.**

**Response:** Thanks for the referee’s suggestion. We listed some joint fraction approaches for soil PSFs interpolation, and mentioned that four machine-learning methods in our study can be applied to deal with multiple dependent variables. We have added this discussion in the discussion section 4.1 “The systematic comparison of the five machine-learning models”.

30

**P25L11** “Moreover, some joint fractions approaches – compositional kriging (Wang and Shi, 2017), High Accuracy Surface Modeling (HASM) (Yue et al., 2016; Yue et al., 2015) and the Dirichlet regression (Hijazi and Jernigan, 2009) – can consider

the multivariate treatment for soil PSFs using a joint model, but machine-learning methods are more convenient to combine environmental covariables. For the machine-learning methods in our study, KNN, MLP, RF and SVM can also be applied to multivariate vectors combined with log ratio methods. For example, the Multivariate Random Forest (MRF) method, which is the extended version of RF, calculates predictions of all output features using single model (Segal and Xiao, 2011). However, not all of five machine-learning methods (e.g., XGB) can extend multiple response setting, they were therefore compared systematically at the level of independent modeling.”

## Reference

- Hijazi, R., and Jernigan, R.: Modelling compositional data using Dirichlet regression models, *Journal of Applied Probability and Statistics*, 4, 77-91, 2009.
- 10 Segal, M., and Xiao, Y. Y.: Multivariate random forests, *Wiley Interdisciplinary Reviews-Data Mining and Knowledge Discovery*, 1, 80-87, <https://doi.org/10.1002/widm.12>, 2011.
- Wang, Z., and Shi, W.: Mapping soil particle-size fractions: A comparison of compositional kriging and log-ratio kriging, *Journal of Hydrology*, 546, 526-541, <https://doi.org/10.1016/j.jhydrol.2017.01.029>, 2017.
- 15 Yue, T.-X., Zhang, L.-L., Zhao, N., Zhao, M.-W., Chen, C.-F., Du, Z.-P., Song, D.-J., Fan, Z.-M., Shi, W.-J., Wang, S.-H., Yan, C.-Q., Li, Q.-Q., Sun, X.-F., Yang, H., Wilson, J., and Xu, B.: A review of recent developments in HASM, *Environmental Earth Sciences*, 74, 6541-6549, <https://doi.org/10.1007/s12665-015-4489-1>, 2015.
- Yue, T., Liu, Y., Zhao, M., Du, Z., and Zhao, N.: A fundamental theorem of Earth’s surface modelling, *Environmental Earth Sciences*, 75, 751, <https://doi.org/10.1007/s12665-016-5310-5>, 2016.
- 20 **Comment 4, finally, the authors should mention how to deal with the possible presence of negative predictions when the analysis is carried out on not-transformed data, as this is not discussed in the paper.**

**Response:** Thanks for the referee’s suggestion. The numbers of negative predictions using ORI method were small, and they can be eliminated by parameter adjustment in our study, but we think it is still a drawback of ORI method. Therefore, we have added discussion of negative predictions using ORI method in the discussion section 4.2 “The systematic comparison of the models combined with log ratio transformed data and original data”.

25

**P25L26** “Due to the contraction of the predicted value (Fig. 8), there were small numbers of predictions beyond the range of original data value, including the negative predictions using ORI method. Though these few negative predictions can be eliminated by parameter adjustment in our study, that is still a drawback of ORI method.”

30

Best regards,

Yours sincerely,

Wenjiao Shi

E-mail: [shiwj@lreis.ac.cn](mailto:shiwj@lreis.ac.cn)

# Systematic comparison of five machine-learning methods in classification and interpolation of soil particle size fractions using different transformed data

Mo Zhang<sup>1,2</sup>, Wenjiao Shi<sup>1,3</sup>

5 <sup>1</sup>Key Laboratory of Land Surface Pattern and Simulation, Institute of Geographic Sciences and Natural Resources Research, Chinese Academy of Sciences, Beijing 100101, China

<sup>2</sup>School of Earth Sciences and Resources, China University of Geosciences, Beijing 100083, China

<sup>3</sup>College of Resources and Environment, University of Chinese Academy of Sciences, Beijing 100049, China

Correspondence to: Wenjiao Shi ([shiwj@reis.ac.cn](mailto:shiwj@reis.ac.cn))

10 **Abstract.** Soil texture and soil particle size fractions (PSFs) play an increasing role in physical, chemical and hydrological processes. Many previous studies have used machine-learning and log ratio transformation methods for soil texture classification and soil PSFs interpolation to improve the prediction accuracy. However, few reports systematically compared the performance of them in both classification and interpolation. Here, a total of 45 evaluation models generated from five machine-learning models – K-nearest neighbor (KNN), multilayer perceptron neural network (MLP), random forest (RF),  
15 support vector machines (SVM), extreme gradient boosting (XGB), combined with original and three log ratio methods – additive log ratio (ALR), centered log ratio (CLR) and isometric log ratio (ILR), were applied to evaluate and compare both of them using 640 soil samples in the Heihe River Basin in China. The results demonstrated that log ratio transformation methods decreased skewness of distributions of soil PSFs data. For soil texture classification, RF and XGB showed better performance with the overall accuracy and kappa coefficients, they were also recommended to evaluate classification capacity  
20 of imbalanced data according to the area under the precision-recall curve (AUPRC) analysis. For soil PSFs interpolation, RF delivered the best performance among five machine-learning models with the lowest root mean squared error (RMSE, sand:

---

Abbreviations: PSFs, particle size fractions; HRB, Heihe River Basin; KNN, K-nearest neighbor; MLP, multilayer perceptron neural network; RF, random forest; SVM, support vector machines; XGB, extreme gradient boosting; ALR, additive log ratio; CLR, centered log ratio; ILR, isometric log ratio; ORI, original; PRC, precision-recall curve; AUPRC, area under the PRC; RMSE, root mean squared error; MAE, mean absolute error;  $R^2$ , coefficient of determination; MAD, median absolute deviation; AD, Aitchison distance; STRESS, standardized residual sum of squares; SD, standard deviation; KNN\_ALR, KNN\_CLR, KNN\_ILR, KNN\_ORI, MLP\_ALR, MLP\_CLR, MLP\_ILR, MLP\_ORI, RF\_ALR, RF\_CLR, RF\_ILR, RF\_ORI, SVM\_ALR, SVM\_CLR, SVM\_ILR, SVM\_ORI, XGB\_ALR, XGB\_CLR, XGB\_ILR, XGB\_ORI, KNN, MLP, RF, SVM, XGB combined with ALR, CLR, ILR, ORI, respectively; CiLo, clay loam; Lo, loam; LoSa, loamy sand; Sa, sand; SaCiLo, sandy clay loam; SaLo, sandy loam; Si, silt; SiCiLo, silty clay loam; SiLo, silt loam.

15.09 %, silt: 13.86 %, clay: 6.31 %), mean absolute error (MAE, sand: 10.65 %, silt: 9.99 %, clay: 5.00 %), Aitchison distance (AD, 0.84) and standardized residual sum of squares (STRESS, 0.61), and the highest coefficient of determination ( $R^2$ , sand: 53.28 %, silt: 45.77 %, clay: 53.75 %). STRESS was improved using log ratio methods, especially CLR and ILR. For the comparison of direct and indirect classification, prediction maps were similar on the middle and upper reaches and different on the lower reaches of the HRB. Moreover, indirect classification maps based on log ratio transformed data had more detailed information. There is a pronounced improvement with 21.3 % of kappa coefficient using indirect methods for soil texture classification compared to the direct ones. RF was recommended as the best strategy among these five machine-learning models according to the accuracy evaluation of soil PSFs interpolation and soil texture classification, and ILR was recommended for component-wise machine-learning methods without multivariate treatment considering the constrained nature of compositional data. In addition, XGB was preferred than other models when trade-off of accuracy and time was considered. Our findings can provide a reference for other research of spatial prediction of soil PSFs and texture using machine-learning methods with skewed distribution soil PSFs data in a large area.

## 1 Introduction

Soil texture, classified by ranges of soil particle size fractions (PSFs), is one of the most important attributes affecting the soil properties and the physical, chemical and hydrological processes covering soil porosity, soil fertility, water retention, infiltration, drainage and aeration. Soil texture distribution can be used for soil fertility management (Pahlavan-Rad and Akbarimoghaddam, 2018), water management (Thompson et al., 2012), maintenance of organic carbon (Bationo et al., 2007), provision of ecosystem services (Adhikari and Hartemink, 2016) etc. The soil PSFs – sand, silt and clay, are vital in most hydrological, ecological, and environmental risk assessment models (Liess et al., 2012). The spatial distributions of soil texture and soil PSFs affect and control runoff generation, slope stability, depth of accumulation and soluble salt content (McNamara et al., 2005; Follain et al., 2006; Yoo et al., 2006; Gochis et al., 2010; Crouvi et al., 2013).

The soil PSFs prediction should consider the ancillary data especially in a large area region, which can enhance the performance of interpolation (Wang and Shi, 2017). Machine-learning methods such as boosting regression trees (Jafari et al., 2014; Yang et al., 2016), random forests (RF) (Hengl et al., 2015; Zeraatpisheh et al., 2017) and artificial neural networks (Bagheri Bodaghabadi et al., 2015; Taalab et al., 2015) have been most commonly employed in both regression and classification combined with environmental covariates in soil science. Machine-learning methods such as RF and gradient boosting had better performance than statistical linear model (e.g., multiple linear regression) in the prediction of soil properties because they are robust to noise and had low bias when dealing with large data sets (Hengl et al., 2015; Hengl et al., 2017). For the accuracy assessment of soil classes prediction among machine-learning methods, artificial neural network and “tree learners” (e.g., decision trees) were preferred because of relatively high overall accuracy and kappa coefficients and the interpretability of the results and the speed of parameterization (Taghizadeh-Mehrjardi et al., 2015; Heung et al., 2016). Most previous studies selected one or more machine-learning algorithms to simulate soil category or continuous variables for

classification or regression problems. However, few studies systematically analyzed both soil texture classification and soil PSFs interpolation using different machine-learning methods.

The soil PSFs, which can be classified as soil texture, are not only continuous variables but also compositional data – the sum constant (1 or 100 %) should be guaranteed. Soil PSFs data, including three dimensions, are typical compositional data, these individual variables in the data set are not independent of each other, which are related by being expressed as a percentage (Filzmoser et al., 2009). Because of the spurious correlations between components, different results would occur on different measurement scales, which makes more complicated interpretation (Abdi et al., 2015; Reimann and Filzmoser, 2000). Indicators and statistical methods defined in the Euclidean geometry or based on Euclidean distances could reveal misleading or biased results (Butler, 1979). Numerous different interpretations of compositional data in soil science have been suggested (Gobin et al., 2001; Salazar et al., 2015; Tolosana-Delgado et al., 2019; Hengl et al., 2018), and the most extensively used method was a combination of log ratio transformation methods involving the additive log ratio (ALR) and the centered log ratio (CLR) put forward by Aitchison (1982), as well as the isometric log ratio (ILR) from Egozcue et al. (2003). Soil PSFs can be predicted using models such as multiple linear regression (Huang et al., 2014) and kriging (Wang and Shi, 2018; Zhang et al., 2013) combining with log ratio transformation methods. However, few studies conducted systematic comparison of accuracy, strengths and weaknesses for different machine-learning methods combining with original (untransformed) data and different log ratio transformed data.

Soil texture classification can be predicted by machine-learning methods directly, and can be derived indirectly from soil PSFs. For the direct soil texture classification, tree-based model such as RF and classification tree (CT) performed better than multinomial logistic regression, support vector machines (SVM) and artificial neural network (ANN) (Camera et al., 2017; Wu et al., 2018). For the indirect classification of soil texture, Poggio and Gimona (2017) combined hybrid geostatistical generalized additive models with ALR and modeled soil particle classes at 250 m resolution in Scotland, expecting that vegetation index, morphological features and information about the phenological season were of vital significance as environmental covariates. Considering the particularity of compositional data, the results of soil PSFs classification and regression could be compared from the direct and indirect soil texture classification in terms of the relationship between soil texture and soil PSFs. Nevertheless, few studies systematically compared the different machine-learning methods for both direct and indirect soil texture classification.

In our study, five machine-learning models – K-nearest neighbor (KNN), multilayer perceptron neural network (MLP), RF, SVM, and extreme gradient boosting (XGB) – were applied for soil texture classification and soil PSFs interpolation. Furthermore, the original and log ratio transformed data were also combined with these five machine-learning methods for soil PSFs interpolation. Hence, the objectives of this study are (i) to compare the performance of five machine-learning models for soil texture classification and soil PSFs interpolation, (ii) to evaluate the performance of machine-learning models using original and different log ratio transformed data for soil PSFs interpolation, and (iii) to estimate the performance of direct and indirect soil texture classification using these methods.

## 2 Data and methods

### 2.1 Study area

The Heihe River Basin (HRB, 97 °6 '– 102 °3 ' E, 37 °43 '– 42 °40 ' N) is situated in the Hexi Corridor in northwest of China, covering the Inner Mongolia Autonomous Region, Gansu and Qinghai provinces, which is the second largest inland river basin in China with an area of 146,700 km<sup>2</sup> (Fig. 1a). The elevation is from 669 m to 5573 m (Fig. 1b). For the upper reaches of HRB, the mean annual precipitation is 350 mm; the annual mean temperature is from -5 to 4 °C; the annual average evaporation is 1000 mm. For the middle reaches of HRB, the mean annual precipitation declines between 250 and 50 mm; the annual average evaporation increases from 2000 (east) to 4000 mm (west); the mean annual temperature is from 2.8 to 7.6 °C. The lower reaches of HRB are situated in Ejina Banner on the Alxa Plateau, which is an arid desert climate with annual precipitation under 50 mm and annual average evaporation above 3500 mm; the mean annual temperature is from 8 to 10 °C.

The vegetation of the upper reaches of the HRB (Fig. 1c) is influenced from the southeast to northwest by hydrothermal conditions. The main vegetation types are alpine vegetation (4000 – 5000 m), alpine meadow vegetation belt (3000 – 4000 m), alpine shrub meadow (3200 – 3800 m), mountain forest meadow belt (2400 – 3200 m), mountain grassland belt (1800 – 2400 m), and desert base belt (less than 1800 m). The main vegetation types of the middle and lower reaches of the HRB are relatively fewer, including cultivated vegetation and desert, and the areas near the Heihe River on the lower reaches are shrub and steppe.

The main soil types (Fig. 1d) are frigid desert soils (higher than 4000 m), alpine meadow soil and alpine steppe soil (3600 – 4000 m), gray cinnamon soil and chernozem (3200 – 3600 m), sierozem and gray cinnamon soil (2600 – 3200 m), gray cinnamon soil (2300 – 2600 m) and sierozem (1900 – 2300 m) on the upper reaches of the HRB. The main soil types on the middle reaches of HRB are aeolian sandy soil, frigid frozen soil and gray brown desert soil. The main soil types in the lower reaches of HRB are aeolian sandy soil, gray brown desert soil (northwest) and lithosol (northeast).

The main types of geomorphology on the upper reaches of the HRB are modern glaciers, alpine, hilly, and intermountain basin (Fig. e). Narrow plains are distributed on the middle reaches of HRB. For the lower reaches, the main types of geomorphology are hilly (northwest), plain, sandy land and platform (east), and the area near Heihe River is a flood plain.

The main land use types of upper reaches, middle reaches and lower reaches were forest land and grassland, cultivated land, unused land, respectively (Fig. 1f). Water area and construction area were mainly distributed on the middle reaches of the HRB and near the Heihe River.

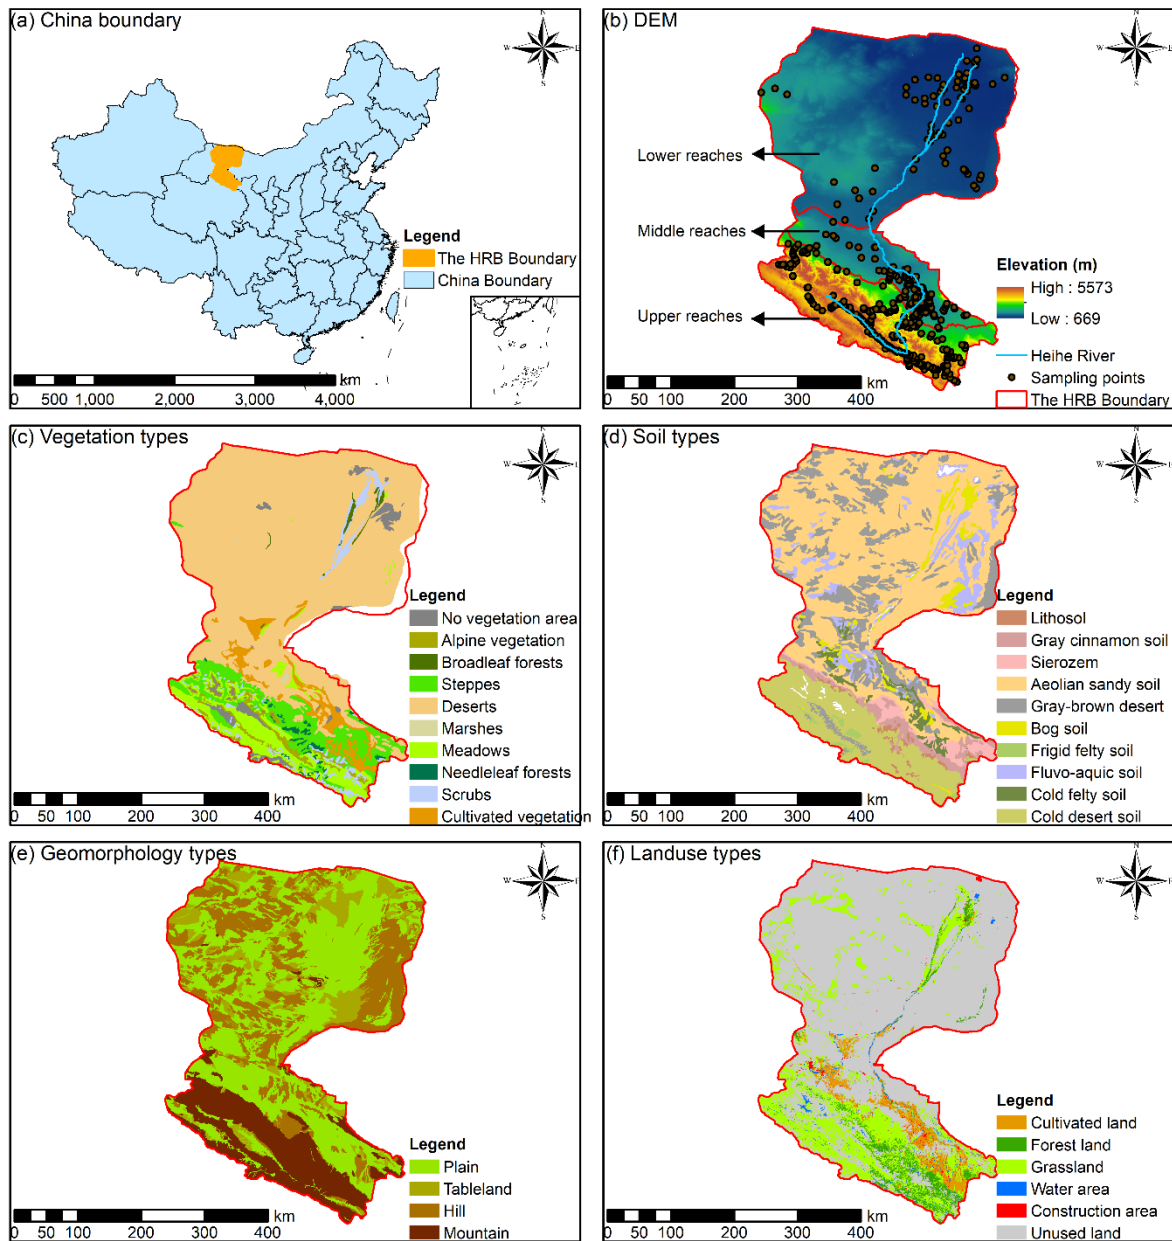

**Figure 1.** The (a) China boundary and the Heihe River Basin (HRB) boundary (b) Heihe River, elevation and soil sampling points of the HRB and (c) vegetation types, (d) soil types, (e) geomorphology types, (f) land use types.



## 2.2 Soil sampling

A total of 640 soil sampling points was collected in the HRB from the Science Data Center of Cold and Arid Regions (WestDC) in China (<http://westdc.westgis.ac.cn/>), involving 392 soil sampling points on the upper reaches and 248 soil sampling points on the middle and lower reaches of the HRB (Fig. 1b). The soil types, vegetation types, distribution of DEM and geomorphology types of the HRB were considered in soil sample collection according to the location and proportion of these types for the purpose of more representative spatial characteristics of soil PSFs using limited soil samples. There were more soil sampling points on the middle and upper reaches of HRB due to the more complicated soil types and vegetation types in these areas. In contrast, the types on the lower reaches are relatively similar with more desert in the northwest. Hence, the east of the lower reaches of the HRB contained more soil sampling points. All soil samples had information about soil PSFs using Malvern Mastersizer 2000 laser diffraction particle size analyzer (average measurement error is less than 3 %). The global position system (GPS) information and related environmental covariates were recorded. Purposive sampling was used as the sampling strategy to collect soil samples and to characterize the spatial variability of soil PSFs especially on such a regional scale of the study area. In this strategy, sample sites were chosen based on the variability of soil formation factors, which represented the heterogeneity of the soil PSFs in the HRB such as the distribution of climate and categorical maps etc. To reduce the noise effect of soil sample, the average of mixed 3 – 5 topsoil (0 – 20 cm) samples for each soil sample and its parallel sample was used as the final measurement. Subsequently, the samples were dried, analyzed and measurement of soil PSFs (approximately 30 g of each sample).

## 2.3 Environmental covariates and pre-processing

The environmental covariates, such as topographic variables, remote sensing variables, climate and position variables, soil physicochemical variables and categorical maps, are related to the distributions of soil PSFs. System for Automated Geoscientific Analysis (SAGA) GIS (Conrad et al., 2015) was used to compute the topographic variables from DEM, including slope, aspect, convergence index, general curvature, plane curvature, profile curvature and valley depth. Remote sensing variables, including the normalized difference vegetation index (NDVI) (Huete et al., 2002), the Brightness index (BI) (Metternicht and Zinck, 2003), and the soil adjusted vegetation index (SAVI) (Huete, 1988) were derived from the Landsat 7 based on band operation. We also collected climate variables from the National Meteorological Information Center (NMIC, <http://data.cma.cn/>) such as the mean annual precipitation and the mean annual temperature. Latitude and longitude were also considered because of the large region of the HRB. Mean annual surface evapotranspiration variable (Wu et al., 2012) were gathered from WestDC (<http://westdc.westgis.ac.cn/>) as well as soil physicochemical variables – soil organic carbon, saturated water content, field water holding capacity, wilt water content, saturated hydraulic conductivity, and soil thickness (Yi et al., 2015; Song et al., 2016; Yang et al., 2016). Additionally, the categorical maps, which were of significance such as geomorphology types, soil types, land use types and vegetation types were also used (Fig. 1).

## 2.4 Machine-learning methods and parameters optimization

### 2.4.1 K-nearest neighbor

5 K-nearest neighbor (KNN) is a simple non-parametric classifier based on the known instance to label unknown instance (Cover and Hart, 1967). For the test set, K-nearest training set vectors (k) were found, and maximum summed kernel densities were computed for classification. Moreover, continuous variables can also be predicted for regression with the average values of K-nearest neighbors. The parameters of KNN contain the maximum value of k (kmax), the distances of the nearest neighbors (distance) and the types of a kernel function (kernel). The KNN model is available in the R package “kkn” (Schliep and Hechenbichler, 2016).

### 2.4.2 Multilayer perceptron neural network

10 Multilayer perceptron neural network (MLP), which was currently one of the most commonly multilayer feedforward backpropagation networks (Zhang et al., 2018), was selected to train artificial neural network (ANN) models in our study due to its rapid operation, the small set of training requirements and ease of implementation (Subasi, 2007). MLP neurons can perform classification or regression depending on whether the response variable is categorical or continuous. The MLP has three sequential layers: input layer, hidden layer and output layer. The resilient backpropagation algorithm was chosen because  
15 the learning rate of this algorithm was adaptive, avoiding oscillations and accelerating the learning process (Behrens and Scholten, 2006). The range of the data set should be standardized because MLPs operate in terms of scale 0 to 1. MLP can be run using the R package “RSNNS” (Bergmeir and Benitez, 2012).

### 2.4.3 Random forest

Random forest (RF) was developed by Breiman (2001), combining the bagging method (Breiman, 1996) with the random  
20 variable selection, and the principle was to merge a group of “weak learners” together to form a “strong learner”. Bootstrap sampling is used for each tree of RF, and the rules to binary split data are different for regression and classification problems. For classification, the Gini index is used to split the data; for regression, minimizing the sum of the squares of the mean deviations can be selected to train each tree model. Benefits of using RFs are that the ensembles of trees are used without pruning. In addition, RF is relatively robust to overfitting, and standardization or normalization is not necessary because it is  
25 insensitive to the range of value. Two parameters should be adjusted for the RF model: the number of trees (ntree) and the number of features randomly sampled at each split (mtry). The RF model is available in the R package “randomForest” (Liaw and Wiener, 2002).

#### 2.4.4 Support vector machine

Support vector machine (SVM), proposed by Cortes and Vapnik (1995), is a type of generalized linear classifier that is widely applied for classification and regression problems in soil science (Burgess, 1998). The main principle of SVM is to classify different classes by constructing an optimal separating hyperplane in the feature space (so-called “structural risk minimization”). Regression problems also can be solved by minimization of the structural risk using loss functions (Vapnik, 1998) in SVM, named support vector regression. The advantages of SVM are that they are effective in high dimensional spaces. Linear function was selected for SVM as the kernel function in our study, and two other parameters need to be tuned, i.e., cost and gamma, controlling the tradeoff between the classification accuracy and complexity, and the ranges of radial effect, respectively. The SVM model is available in the R package “e1071” (Meyer et al., 2017).

#### 10 2.4.5 Extreme gradient boosting

Extreme gradient boosting, put forward by Chen and Guestrin (2016), is an efficient method of implementation for gradient boosting frames, tree learning algorithms, and efficient linear model solvers to solve both classification and regression problems (Chen et al., 2018). Like the boosted regression trees (Elith et al., 2008), it follows the principle of gradient enhancement; however, more regularized model formalization is applied to XGB to control over-fitting, making it perform better in terms of accuracy assessment. The residuals of the first tree can be fitted by the second tree to enhance the model accuracy and the sum of the prediction of each tree generates the ultimate prediction. There are seven parameters in XGB – the learning rate (eta), the maximum depth of a tree (max\_depth), the max number of boosting iterations (nrounds), the subsample ratio of columns (colsample\_bytree), the subsample ratio of the training instance (subsample), the minimum loss reduction (gamma) and the minimum sum of instance weight (min\_child\_weight). The XGB model is available in the R package “xgboost” (Chen et al., 2018).

#### 2.4.6 Parameters optimization

R package “caret” (Kuhn, 2018) for MLP, SVM, XGB, “randomForest” for RF and “kkn” for KNN were used to adjust parameters. A set of parameters with the lowest RMSE for regression and the highest kappa coefficient for classification by cross-validation will be selected as the best parameters. There are 11 dependent variables (i.e., “sand, silt, clay, ilr1, ilr2, alr1, alr2, clr1, clr2, clr3” for regression and “class” for classification) trained with environmental covariates (independent variables).

All the methods were applied independently on these 11 components (Table S2.1). The equation description of five machine-learning methods can be found in the Supplementary Section S1. More details about parameters optimization and independent modeling were demonstrated in the Supplementary Section S2. The adjusted parameters and equation description of five machine learning methods can be found in Supplementary Section S1 and S2 (Table S2.1).

30

## 2.5 Log ratio transformation methods

For the composition of  $D$  elements  $\mathbf{x} = [x_1, \dots, x_D]$ ,  $x_j > 0$ ,  $\forall j = 1, 2, \dots, D$ , and  $\sum_{j=1}^D x_j = 1$ , the transformation equation for ALR, CLR and ILR are defined as follows:

$$alr(\mathbf{x}) = (\ln \frac{x_1}{x_j}, \dots, \ln \frac{x_{j-1}}{x_j}, \ln \frac{x_{j+1}}{x_j}, \dots, \ln \frac{x_D}{x_j}), \quad (1)$$

$$5 \quad clr(\mathbf{x}) = (\ln \frac{x_1}{\sqrt[D]{\prod_{j=1}^D x_j}}, \dots, \ln \frac{x_D}{\sqrt[D]{\prod_{j=1}^D x_j}}), \quad (2)$$

$$\mathbf{z} = (z_1, \dots, z_{D-1}) = ilr(\mathbf{x}), \quad (3)$$

$$z_i = \sqrt{\frac{D-i}{D-i+1}} \ln \frac{x_i}{\sqrt[D-i]{\prod_{j=i+1}^D x_j}}, \text{ for } i = 1, \dots, D-1, \quad (4)$$

where  $z_i$  is the  $i$ th component. The inverse transformation equations for ALR, CLR and ILR were computed in the ‘‘compositions’’ R package (van den Boogaart and Tolosana-Delgado, 2008), which were defined as follows:

$$10 \quad \overline{alr}(x_j) = \frac{\exp(alr(x_j))}{\sum_{j=1}^D \exp(alr(x_j))}, \quad (5)$$

$$\overline{clr}(x_j) = \frac{\exp(clr(x_j))}{\sum_{j=1}^D \exp(clr(x_j))}, \quad (6)$$

$$Y(x_j) = \sum_{j=1}^D \frac{ilr(x_j)}{\sqrt{j \times (j+1)}} - \sqrt{\frac{j-1}{j}} \times ilr(x_j), \quad (7)$$

$$ilr(x_0) = ilr(x_D) = 0, \quad (8)$$

$$\overline{ilr}(x_j) = \frac{\exp(Y(x_j))}{\sum_{j=1}^D \exp(Y(x_j))}, \quad (9)$$

15 For original data, the standardization function was used to ensure predictions of soil PSFs were between 0 and 100 and that their sum was 100%:

$$sand_s = \frac{sand}{(sand+silt+clay)} \times 100, \quad (10)$$

where  $sand_s$  is the content of sand after standardization, and the same as silt and clay fractions.

## 2.6 Validation

### 20 2.6.1 Validation method

We used a total of 45 models including five machine-learning methods combined with original (ORI) and three log ratio methods (ALR, CLR, ILR): five machine-learning methods for direct soil texture classification (5 models), and these methods combined with original data and log ratio transformed data for indirect soil texture classification (20 models) and soil PSFs interpolation (20 models) (Table 1). The data were randomly divided into two sets: 448 soil samples (70 %) for training and

25 192 soil samples (30 %) for validation. This process was repeated 30 times.

**Table 1.** The method system of soil texture classification and soil PSFs interpolation.

| Methods                                    | Soil texture classification |                                                                                                                                     | Soil PSFs interpolation |
|--------------------------------------------|-----------------------------|-------------------------------------------------------------------------------------------------------------------------------------|-------------------------|
|                                            | Direct classification       | Indirect classification                                                                                                             | –                       |
| Original data (ORI)                        | KNN, MLP, RF, SVM, XGB      | KNN_ORI, MLP_ORI, RF_ORI, SVM_ORI, XGB_ORI                                                                                          |                         |
| Log-ratio transformed data (ALR, CLR, ILR) | –                           | KNN_ALR, KNN_CLR, KNN_ILR, MLP_ALR, MLP_CLR, MLP_ILR, RF_ALR, RF_CLR, RF_ILR, SVM_ALR, SVM_CLR, SVM_ILR, XGB_ALR, XGB_CLR, XGB_ILR, |                         |

### 2.6.2 Validation indicators for soil texture classification

We used the overall accuracy, kappa coefficients, area under the precision-recall curve (AUPRC) and abundance index to validate the performance of different models. The first two indicators were selected to evaluate the overall prediction performance of soil texture types, and the last two were applied to evaluate the performance of each soil texture type.

The overall accuracy represents all samples of soil texture types correctly classified by machine-learning models, divided by the total number of samples of soil texture types used in the validation. The overall accuracy is defined as follows (Brus et al., 2011):

$$\text{Overall Accuracy} = \frac{TP+TN}{TP+TN+FP+FN}, \quad (11)$$

where  $TP, TN, FP, FN$  were true positive, true negative, false positive and false negative, respectively.

Kappa coefficient demonstrates the agreement of observed classes and measured classes, which is calculated based on the confusion matrix, the equation is defined as:

$$\text{kappa} = \frac{p_o - p_e}{1 - p_e}, \quad (12)$$

where  $p_o$  is the probability of observed agreement (overall accuracy) and  $p_e$  is the probability of agreement when two classes are unconditionally independent. The strength of the kappa coefficients is interpreted in the following manner: 0.01 – 0.20: slight, 0.21 – 0.40: fair, 0.41 – 0.60: moderate, 0.61 – 0.80: substantial, 0.81 – 1.00: almost perfect (Landis and Koch, 1977). The probabilities of different soil texture types (sum to 1) obtained during the training and predicting processes of machine-learning models were selected to calculate the precision and recall, which indicated the extent of identifying positive cases:

$$\text{Recall} = \frac{TP}{TP+FN}, \quad (13)$$

$$\text{Precision} = \frac{TP}{TP+FP}, \quad (14)$$

Soil texture are a class-imbalanced data set of positive and negative with 62.5% silt loam types, and the negative classifier would be overvalued under these circumstances because of the overabundance of majority (negative) examples, additionally revealing overly optimistic findings (Davis and Goadrich, 2006). PRCs are informative in dealing with class-imbalanced data (Fu et al., 2017). The R package “precrec” (Saito and Rehmsmeier, 2017) can generate PRCs and compute AUPRC for each soil texture type. This process was repeated 30 times and eventually, and then the average PRCs and AUPRCs were obtained.

Similarly, confusion index (COI) based on prediction probability was calculated to evaluate the uncertainties of machine-learning models of classification (Burrough et al., 1997), which equation was as follows:

$$COI = \frac{\sum_{i=1}^n [1 - (P_{max,i} - P_{secmax,i})]}{n} \quad (15)$$

where  $P_{max,i}$  refers to the maximum value of probability of soil sampling point  $i$  and  $P_{secmax,i}$  represents the second highest value of probability of soil sampling point  $i$ . A lower COI indicates better performance of model.

Abundance index was applied to describe the proportion of all soil texture types and well-classified soil texture types in prediction maps, which was defined as follows:

$$Abundance\ index = p/t, \quad (16)$$

where  $p$  is all soil texture types in prediction maps and  $t$  is well-classified soil texture type(s) in test sets. All nine soil texture types were involved in the test sets to ensure the balance of the soil texture types, including clay loam (ClLo: 12), loam (Lo: 57), loamy sand (LoSa: 18), sand (Sa: 23), sandy clay loam (SaClLo: 4), sandy loam (SaLo: 58), silt (Si: 31), silty clay loam (SiClLo: 37), and silt loam (SiLo: 400).

### 2.6.3 Validation indicators for soil PSFs interpolation

Five statistical indicators, including coefficient of determination ( $R^2$ ), root mean square error (RMSE), mean absolute error (MAE), Aitchison distance (AD) (Aitchison, 1992), and standardized residual sum of squares (STRESS) (Martin-Fernandez et al., 2001) were used to validate the methods of soil PSFs interpolation. The equations for the validation indicators  $R^2$ , RMSE, MAE, AD and STRESS are as follows:

$$R^2 = \frac{\sum_{i=1}^n (Y_{i,m} - Y_{i,e})}{\sum_{i=1}^n (Y_{i,m} - \bar{Y}_{i,m})} \quad (17)$$

$$RMSE = \sqrt{\frac{1}{n} \sum_{i=1}^n (Y_{i,m} - Y_{i,e})^2}, \quad (18)$$

$$MAE = \frac{1}{n} \sum_{i=1}^n |Y_{i,m} - Y_{i,e}|, \quad (19)$$

where  $Y_{i,m}$ ,  $Y_{i,e}$ ,  $\bar{Y}_{i,m}$  and  $n$  are measured, estimated and the mean of measured soil PSFs and the number of observations (soil sampling points for validation). Closer to 1 and higher values of  $R^2$  and the lower values of RMSE and MAE show better performance of models.

$$AD = \left[ \sum_{i=1}^D \left[ \log \frac{x_i}{g(x)} - \log \frac{x_i}{g(X)} \right]^2 \right]^{1/2}, \quad (20)$$

$$STRESS = \left[ \frac{\sum_{i<j} (AD_{x,ij} - AD_{X,ij})^2}{\sum_{i<j} (AD_{x,ij})^2} \right]^{1/2}, \quad (21)$$

where  $x$  is the observed value;  $X$  is the predicted value;  $D$  is the number of dimensions (for soil PSFs are 3);  $g(x)$  denotes the geometric mean  $(x_1 \dots x_D)^{1/D}$ ;  $AD_{x,ij}$  and  $AD_{X,ij}$  are the  $ADs$  between the observed soil PSFs and the predicted soil PSFs at sites  $i$  and  $j$ . Both present that model performances are better when the values are lower. The standard deviation (SD) of prediction values and the ranges of 95 % confidence interval (CI) (Streiner, 1996) of indicators derived from running models 30 times to assess model uncertainty.

## 2.7 Statistical analysis for the original and log ratio transformed data

The standard deviation (SD), coefficient of variation (CV), mean, minimum (Min), maximum (Max), median absolute deviation (MAD), skewness (Skew), kurtosis and Kolmogorov-Smirnov (k-s) test ( $p > 0.05$ ) were employed for descriptive statistical analysis of the original and log ratio transformed data. Furthermore, multivariate median based on depth measures (Bedall and Zimmermann, 1979; Gower, 1974; Small, 1990) were used because of the sum-constraint of compositional soil PSFs data. The arithmetic mean of log ratio transformation data should be back-transformed to the original space. For  $\mathbf{X} = [X_1, \dots, X_n]$ , the MAD can be calculated according to the Eq. (22) as below:

$$MAD(\mathbf{X}) = \text{median}(|X_i - \text{median}(\mathbf{X})|). \quad (22)$$

## 3 Results

### 3.1 The descriptive statistics for the original and log ratio transformed soil PSFs data

For the original data of sand content, the mean (30.64 %) was much higher than that of median center (26.06 %). In contrast, silt and clay contents were the opposite, with lower means (silt: 55.79 %, clay: 13.57 %) than median centers (silt: 59.51 %, clay: 14.43 %). For the log ratio transformed data, different log ratio methods delivered the same means for sand, silt and clay. Additionally, the means of sand (28.69 %) and silt (60.54 %) were closer to the median centers of the original data except for clay with a mean of 10.78 %. For SD and CV, soil PSFs data in log ratio geometry had more stability and less variability compared with the original data. ILR and CLR had the lowest MAD for the first component (0.66) and the second component (0.43), respectively (Fig. 2). Although the  $p$  values of the original and different log ratio transformed data were not significant, log ratios made the data more symmetric according to the skews (Fig. 2). All log ratio methods had lower skews (ALR: 0.77, CLR: 0.88, ILR: -1.20) than those of the original data (1.24) of the first component. All the kurtoses of log ratio methods were much higher compared with the results generated from original data.

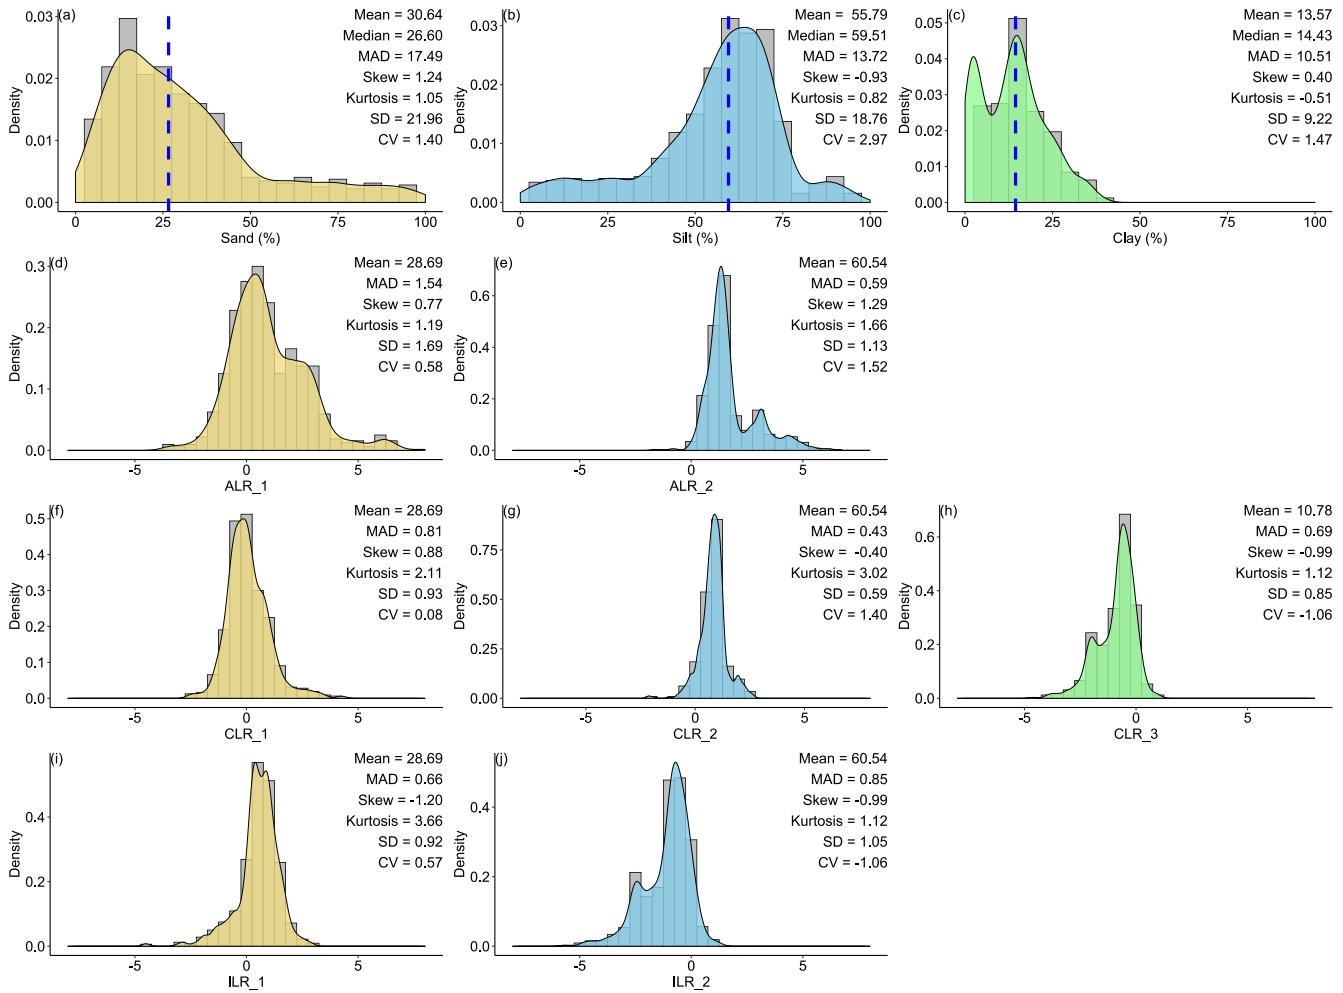

**Figure 2.** Descriptive statistical analysis for the original and log ratio transformed soil sampling data of (a) sand, (b) silt, (c) clay, (d) ALR\_1, (e) ALR\_2, (f) CLR\_1, (g) CLR\_2, (h) CLR\_3, (i) ILR\_1 and (j) ILR\_2. SD is standard deviation, CV is the coefficient of variation, and the Median is multivariate median based on depth measures. ALR and ILR transformed  $S^3$  (the simplex) to  $R^2$  (the real space), and CLR transformed  $S^3$  to  $R^3$ . Note that the means of log ratio transformed data were back-transformed to the real space. Blue dashed lines showed the multivariate medians of original data.

## 3.2 Comparison of the machine-learning models in the classification of soil texture types

### 3.2.1 Comparison of the validation indicators for soil texture classification

The overall accuracy of each model ranged from 0.613 to 0.636 (Fig. 3a). RF had the highest overall accuracy (0.636) among the five models, followed closely by the accuracy of KNN (0.630) and MLP (0.627). SVM (0.618) and XGB (0.613) were relatively lower than other models. The highest kappa coefficient was generated from MLP (0.242), followed by RF (0.238),



XGB (0.229), KNN (0.213) and SVM (0.213) (Fig. 3b). For uncertainties of models with confusion indices (COIs), XGB (0.278) delivered the best performance, and RF (0.501) demonstrated the highest confusion of models (Fig. 3c).

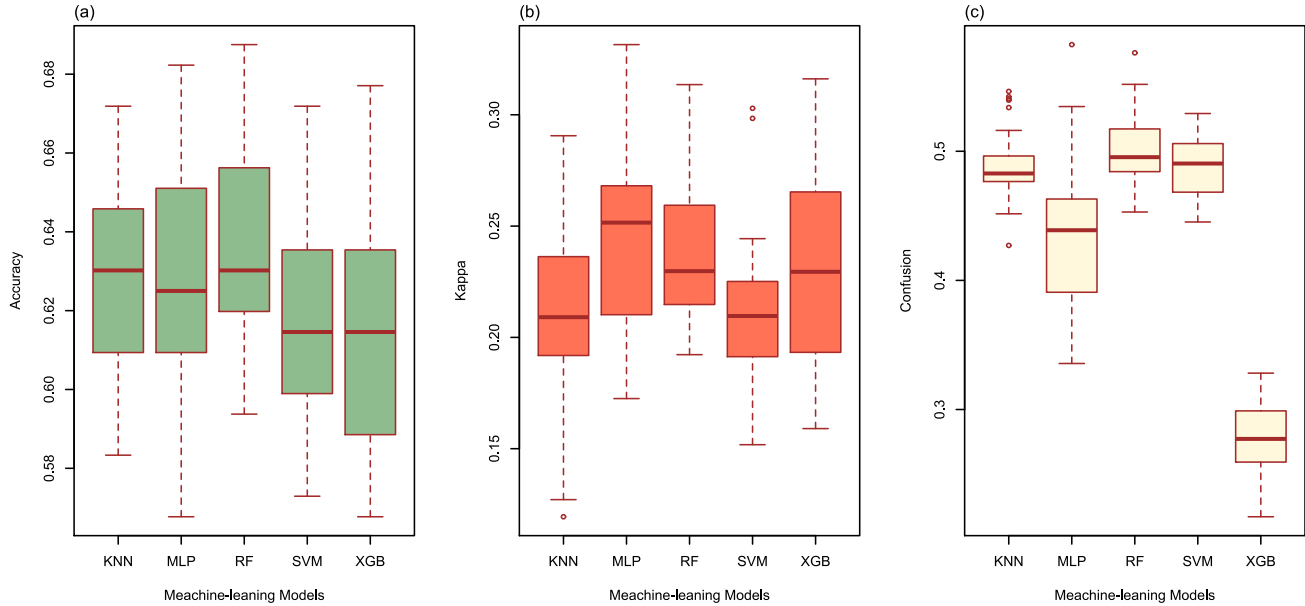

**Figure 3.** (a) The overall accuracy, (b) kappa coefficients and (c) confusion index (COI) for different machine-learning models of KNN, MLP, RF, SVM and XGB.

We combined the PRCs of the five machine-learning methods in Fig. 4 to evaluate the performance of them in predicting each soil texture type using imbalanced data with different samples of each type. We found that the AUPRCs of types with fewer positive examples were typically small, especially in the case of SaClLo (only 4 samples), which resulted in unsatisfying results because the lack of soil sampling points made models learn poorly during the training process. Hence, the soil texture types (Lo, SaLo, SiLo, SiClLo) with more positive examples delivered superior results to those with fewer positive examples. Moreover, these soil texture types had significant differences in AUPRCs. For example, SiLo, which had the largest number of samples, was the most effective among these nine types. For soil texture classes with more samples, RF and XGB performed better, and for soil texture classes with less samples, RF and SVM had better performance according to the AUPRCs.

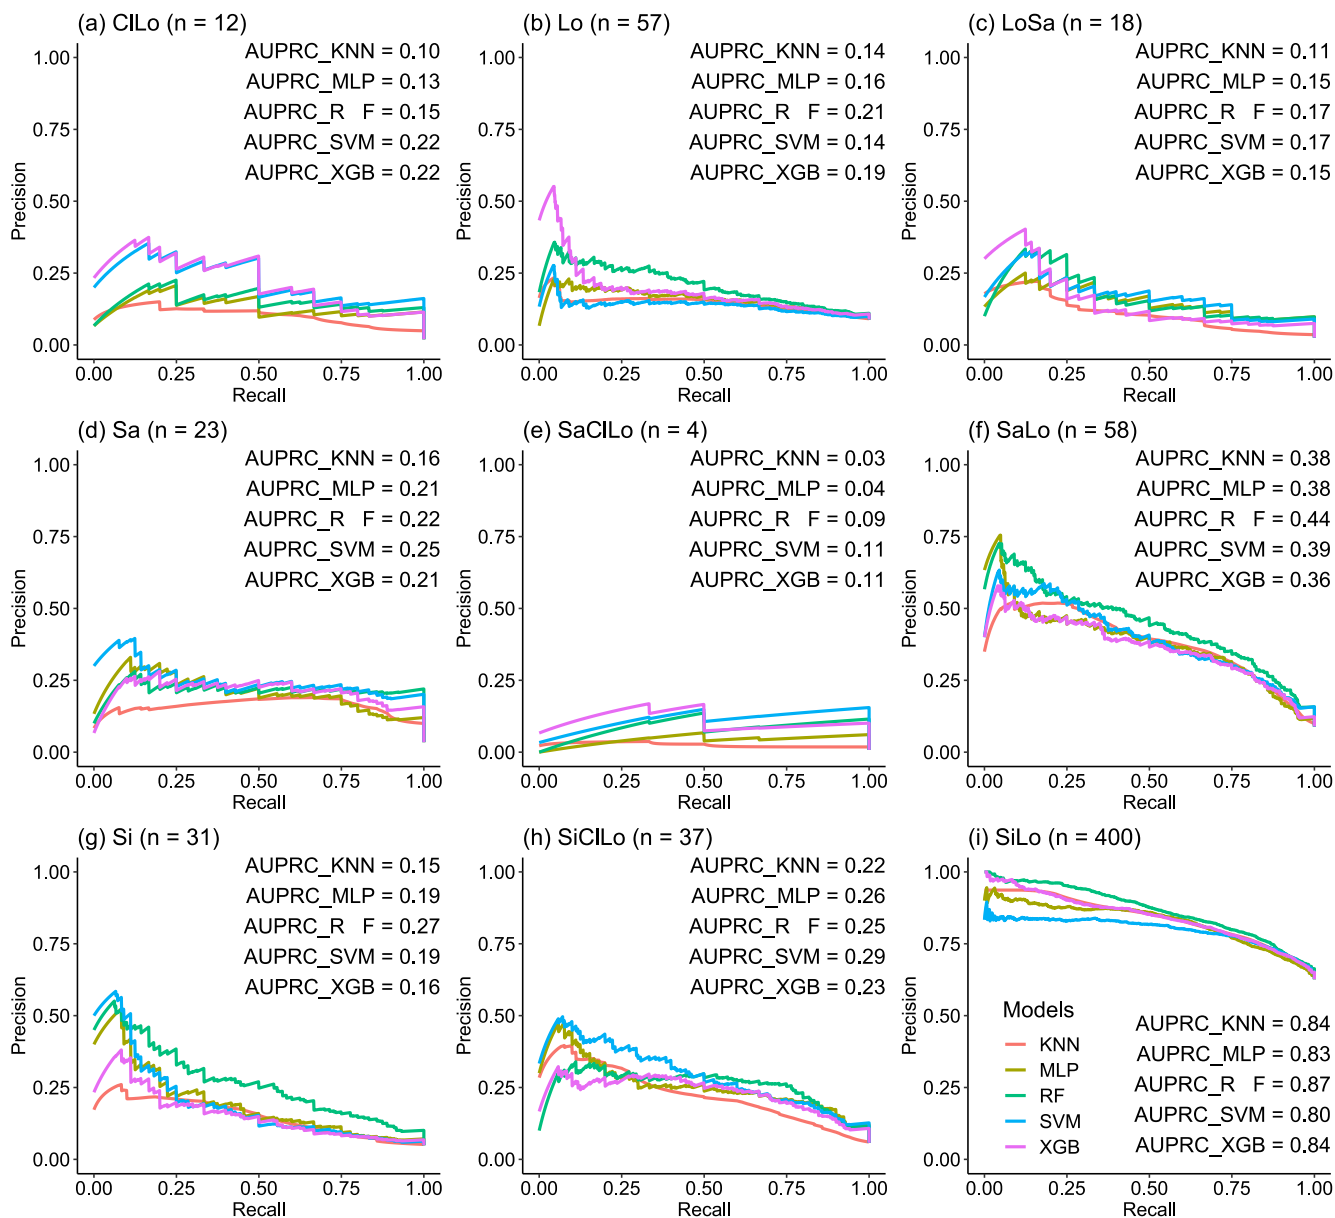

**Figure 4.** The AUPRCs for different machine-learning methods of each soil texture type (a) ClLo (b) Lo (c) LoSa (d) Sa (e) SaClLo (f) SaLo (g) Si (h) SiClLo (i) SiLo; n was the sampling points of different soil texture types.

### 3.2.2 Comparison of the prediction maps for soil texture classification

5 Prediction maps of soil texture types in the HRB using machine-learning models delivered quite different spatial distributions in the overall performance of different models (Fig. 5). The abundance indices pointed out that SVM can predicted all of 9

types, KNN and XGB predicted 8 of 9 types, followed closely by RF (7 of 9 types) and MLP (6 of 9 types). The maps predicted by RF, SVM and XGB illustrated that the main soil texture types in the northwest of the lower reaches of HRB were mostly LoSa, while other prediction models produced SaLo. On the upper reaches of the HRB, soil texture types generated from RF were more abundant and more in accordance with the real environment (Fig. 1).

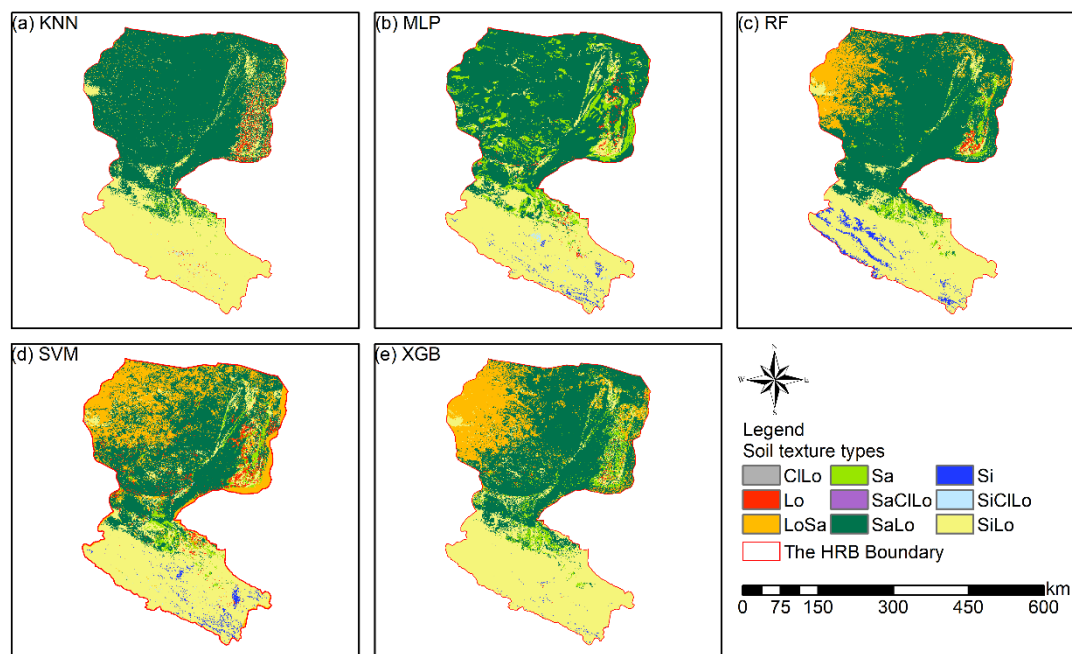

5

**Figure 5.** Soil texture classification prediction maps of different soil texture types of (a) KNN, (b) MLP, (c) RF, (d) SVM and (e) XGB.

### 3.3 Comparison of the machine-learning models combined with log ratio transformed methods in the interpolation of soil PSFs

#### 10 3.3.1 Comparison of the validation indicators for interpolation of soil PSFs

We compared the performance of each machine-learning model combined with the original and the log ratio transformed data of soil PSFs. The results indicated that the STRESS of the methods using log ratio transformed data were superior to these methods using original data (Table 2). The RMSE, MAE,  $R^2$  and AD generated from KNN, MLP, RF and XGB using original data outperformed the results using log ratio transformed data. By comparison among different log ratio transformed data of the same machine-learning model, ILR and CLR outperformed ALR in these models. In Table 2, KNN\_CLR demonstrated the most remarkable performance with the highest  $R^2$  and the lowest RMSE and MAE among KNN using the three log ratios. Furthermore, RF and SVM using CLR and ILR transformed data generated relatively similar results. XGB\_ILR showed the best performance with most of the indicators except for RMSE (6.75 %) and MAE (5.36 %) of clay, and STRESS (0.63). RF

had the lowest RMSE and MAE, the highest  $R^2$ , and the lowest AD and STRESS for ALR, CLR and ILR. For original data, RF also outperformed other models.

**Table 2.** The comparisons of accuracy of different machine-learning models combined with original and transformed data.

|         | RMSE (%)     |              |             | MAE (%)      |             |             | $R^2$ (%)    |              |              | AD          | STRESS      |
|---------|--------------|--------------|-------------|--------------|-------------|-------------|--------------|--------------|--------------|-------------|-------------|
|         | Sand         | Silt         | Clay        | Sand         | Silt        | Clay        | Sand         | Silt         | Clay         |             |             |
| KNN_ALR | 16.05        | 15.04        | 7.12        | 11.35        | 10.93       | 5.59        | 47.02        | 36.11        | 41.07        | 0.90        | 0.62        |
| KNN_CLR | 15.82        | 14.77        | 7.09        | 11.21        | 10.74       | 5.58        | 48.48        | 38.37        | 41.43        | 0.88        | 0.62        |
| KNN_ILR | 15.82        | 14.82        | 7.14        | 11.22        | 10.84       | 5.60        | 48.46        | 37.88        | 40.74        | 0.88        | 0.64        |
| KNN_ORI | 15.51        | 14.47        | 7.05        | 11.12        | 10.51       | 5.49        | 50.59        | 40.92        | 42.24        | <b>0.84</b> | 0.66        |
| MLP_ALR | 15.83        | 15.07        | 7.43        | 11.42        | 11.06       | 5.97        | 48.50        | 35.82        | 35.79        | 0.92        | 0.66        |
| MLP_CLR | 15.84        | 15.07        | 7.41        | 11.45        | 11.05       | 5.96        | 48.42        | 35.86        | 36.19        | 0.92        | 0.66        |
| MLP_ILR | 15.84        | 15.07        | 7.40        | 11.46        | 11.04       | 5.95        | 48.40        | 35.85        | 36.32        | 0.92        | 0.66        |
| MLP_ORI | 15.80        | 14.72        | 6.96        | 11.50        | 10.85       | 5.52        | 48.75        | 38.84        | 43.72        | 0.90        | 0.68        |
| RF_ALR  | 15.50        | 14.43        | 6.62        | 10.90        | 10.52       | 5.24        | 50.57        | 41.23        | 48.90        | 0.86        | <b>0.61</b> |
| RF_CLR  | 15.28        | 14.22        | 6.61        | 10.70        | 10.25       | 5.21        | 51.95        | 42.89        | 49.16        | 0.86        | <b>0.61</b> |
| RF_ILR  | 15.27        | 14.25        | 6.66        | 10.66        | 10.26       | 5.26        | 51.99        | 42.60        | 48.28        | 0.86        | <b>0.61</b> |
| RF_ORI  | <b>15.09</b> | <b>13.86</b> | <b>6.31</b> | <b>10.65</b> | <b>9.99</b> | <b>5.00</b> | <b>53.28</b> | <b>45.77</b> | <b>53.75</b> | <b>0.84</b> | 0.66        |
| SVM_ALR | 15.66        | 14.59        | 6.76        | 11.66        | 10.88       | 5.34        | 49.61        | 39.87        | 46.89        | 0.88        | 0.66        |
| SVM_CLR | 15.27        | 14.36        | 6.87        | 11.01        | 10.41       | 5.41        | 52.12        | 41.85        | 45.14        | 0.87        | 0.65        |
| SVM_ILR | 15.29        | 14.37        | 6.84        | 10.92        | 10.43       | 5.42        | 51.99        | 41.69        | 45.58        | 0.87        | 0.65        |
| SVM_ORI | 15.30        | 14.38        | 6.92        | 10.94        | 10.32       | 5.43        | 51.98        | 41.71        | 44.45        | 0.87        | 0.67        |
| XGB_ALR | 15.82        | 14.92        | 6.72        | 11.32        | 11.01       | 5.35        | 48.57        | 37.23        | 47.44        | 0.88        | 0.64        |
| XGB_CLR | 15.70        | 14.80        | 6.75        | 10.96        | 10.67       | 5.39        | 49.23        | 38.10        | 46.90        | 0.88        | 0.62        |
| XGB_ILR | 15.45        | 14.57        | 6.75        | 10.91        | 10.52       | 5.36        | 50.88        | 40.01        | 47.01        | 0.88        | 0.63        |
| XGB_ORI | 15.15        | 14.05        | 6.47        | 10.88        | 10.15       | 5.15        | 52.85        | 44.27        | 51.36        | 0.86        | 0.68        |

### 3.3.2 Comparison of the interpolation prediction maps of soil PSFs

- 5 Interpolation prediction maps of soil PSFs using log ratio transformed data (ILR) and original data were represented in Figs. 6, S4.1 and S4.2. The maps generated from models combined with ILR transformed data showed closer ranges to the original soil sampling data in the case of sand (0.98 – 99.66 %), silt (0.17 – 95.87 %) and clay (0.03 – 39.77 %), and the texture features were more suitable for the distributions of the real environment (Figs. 6, S4.1 and S4.2). With respect to different machine-learning models, RF and XGB delivered prediction maps that were closer to the range of the distribution of original data than
- 10 did KNN, SVM and MLP.

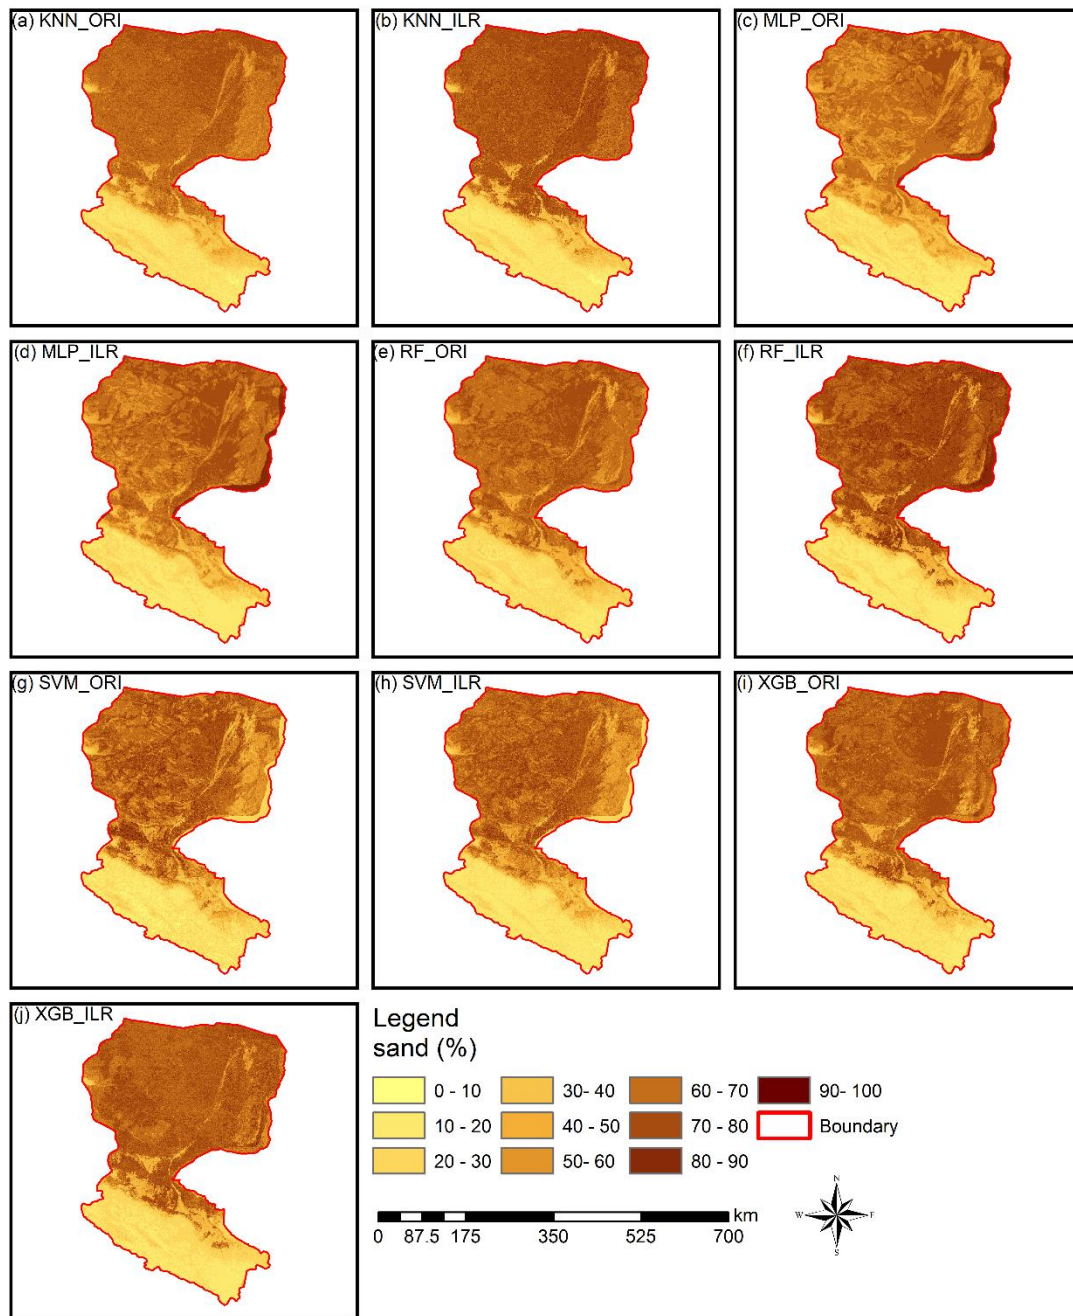

**Figure 6.** The interpolation prediction maps of sand fraction. All the ranges of prediction maps of sand (approximately 9.0 – 90.0 %) were within the range of original data (0.98 – 99.66 %). RF\_ILR (7.9 – 94.7 %) and XGB\_ORI (1.8 – 92.4 %) generated wider output distributions and were relatively closer to the range of the distribution of original data than other

prediction maps such as KNN\_ILR (7.3 – 88.6 %), KNN\_ORI (7.8 – 80.8 %), MLP\_ILR (8.8 – 90.8 %), MLP\_ORI (9.0 – 90.3 %), RF\_ORI (9.0 – 81.0 %), SVM\_ILR (6.5 – 85.6 %), SVM\_ORI (7.3 – 90.0 %) and XGB\_ILR (5.0 – 88.5 %).

### 3.4 Comparison of direct and indirect soil texture classification

#### 3.4.1 Comparison of the validation indicators for direct and indirect soil texture classification

5 The overall accuracy and kappa coefficients of indirect classification were improved by using log ratio transformed data, especially RF and XGB (Fig. 7). ILR of five machine-learning models showed the highest overall accuracy among three log ratio transformation methods, which also demonstrated the best performance according to kappa coefficients, except for MLP. We also compared direct classification (Fig. 3) with indirect classification and found that the differences of overall accuracy of direct and indirect classification were negligible. In turn, the kappa coefficients were greatly modified using indirect classification compared with direct classification other than MLP; peculiarly, RF\_ILR increased the kappa coefficient to 0.291 (21.3 % improvement) while keeping accuracy stable.

10

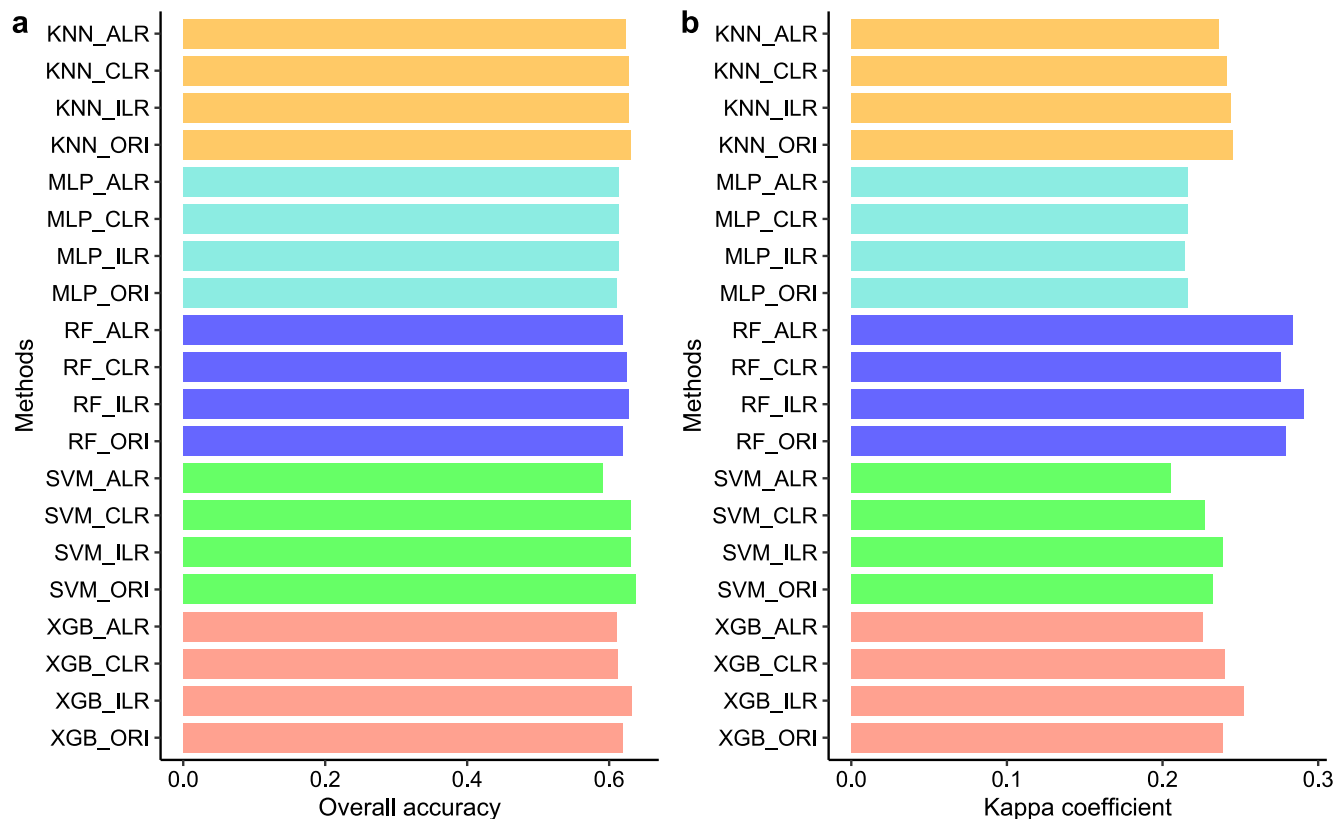

**Figure 7.** Overall accuracy and kappa coefficients calculated from soil texture classification by soil PSFs interpolation using five machine-learning models combined with original data and log ratio transformed data. Note that the highest overall accuracy is SVM\_ORI (0.638), and the highest kappa coefficient is RF\_ILR (0.291).

### 3.4.2 The prediction performance of soil texture types from different methods

5 The distributions of soil texture classes using original data and ILR transformed data were illustrated in the USDA soil texture triangle (Fig. 8). The triangle of the original soil PSFs data (Fig. 8a) demonstrated wider ranges of spatial dispersion than the interpolation data using machine-learning models, revealing the properties of aggregate from the sides to the center of triangles. With respect to these machine-learning models, RF showed the most dispersed feature in accordance with the original soil PSFs data. The distributions predicted from models combined with ILR transformed data were more discrete and more associated with the original soil PSFs data than those resulting from ORI methods. The results of prediction represented striking differences in that the error ratio (yellow color) of soil sampling points on types of LoSa, SaLo and Lo (left side of triangles) were significantly more than those on types of SiLo and Si (the right side of triangles) for most models, especially KNN and MLP. The log ratio methods overestimated the component of silt in the process of transformation (Fig. 2); in this way, these points were biased to the right of the USDA soil texture triangle based on overall contraction (regression smoothing effects), crossing the classification boundary and becoming other soil texture types. RF\_ILR (Fig. 8f) delivered the highest right ratio (RR) among these models, and the classification accuracy was enhanced using the ILR method (83.9%) compared with ORI (81.7%). In the case of other models, the differences between ORI and ILR were negligible. We also compared the RRs of indirect classification models with those of direct classification, demonstrating all RRs of direct classification were higher (KNN: 67.97 %; MLP: 75.16 %; RF: 100 %; SVM: 66.09 %; XGB: 81.09 %), especially RF and XGB; however, we removed this evaluation indicator because the same data sets were employed in the processes of training and predicting.

10

15

20

(a) Soil PSFs sampling data

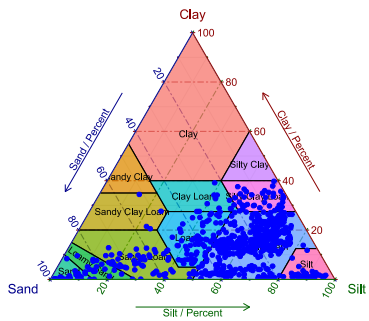

(b) KNN\_ILR (65.0%)

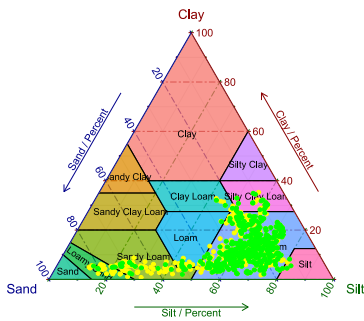

(c) KNN\_ORI (65.9%)

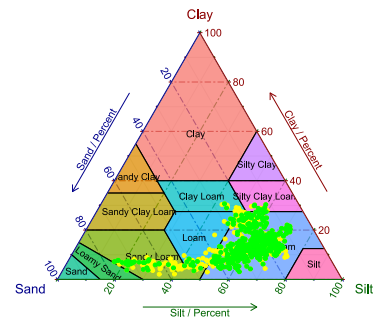

(d) MLP\_ILR (63.3%)

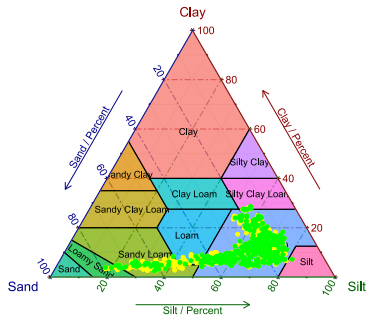

(e) MLP\_ORI (63.6%)

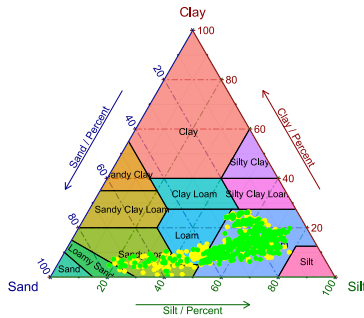

(f) RF\_ILR (83.9%)

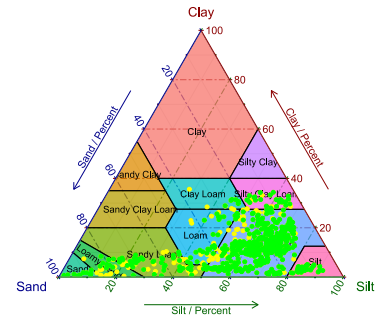

(g) RF\_ORI (81.7%)

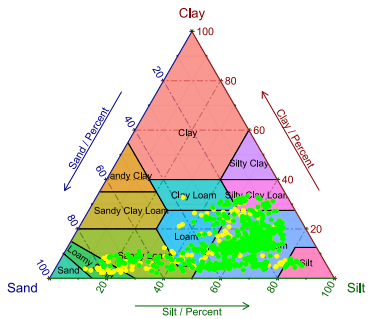

(h) SVM\_ILR (66.1%)

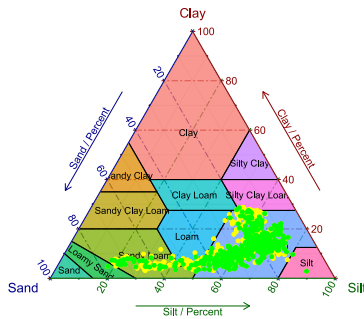

(i) SVM\_ORI (66.4%)

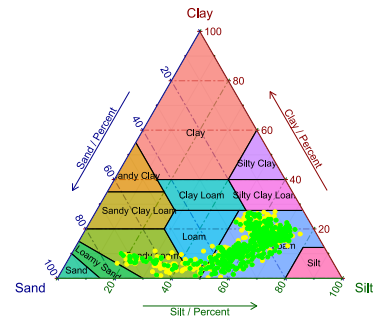

(j) XGB\_ILR (67.8%)

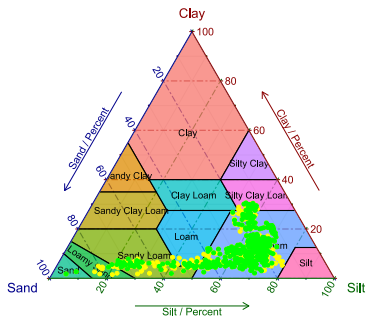

(k) XGB\_ORI (68.0%)

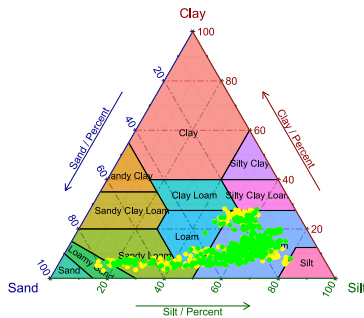

Textural Class

- Clay
- Sandy Clay
- Sandy Clay Loam
- Sandy Loam
- Loamy Sand
- Sand
- Clay Loam
- Loam
- Silt Loam
- Silty Clay
- Silty Clay Loam
- Silt



**Figure 8.** Soil texture types of 640 soil samples shown in USDA texture triangle. The results of soil PSFs were generated from (a) soil PSFs samples (b) KNN\_ILR, (c) KNN\_ORI, (d) MLP\_ILR, (e) MLP\_ORI, (f) RF\_ILR, (g) RF\_ORI, (h) SVM\_ILR, (i) SVM\_ORI, (j) XGB\_ILR, and (k) XGB\_ORI. Note that right points (green) mean that the predicted soil texture classes and these classes corresponding to the original data were the same; wrong points (yellow) were the opposite. The predicted right ratios (RRs) of the soil texture classes were in the bracket after interpolators in plots.

### 3.4.3 Comparison of prediction maps of direct and indirect soil texture classification

The soil texture maps predicted using original data were different from those generated from log ratio transformed data, and classification maps of the machine-learning models combined with the log ratio transformed data had more detailed information (Figs. 9 and S5.1). The machine-learning model using three log ratio transformed data were similar in the number of each predicted type; however, there were significant differences between using original data and log ratio transformed data. All machine-learning models combined with original data predicted more Lo and SaLo, and fewer LoSa and Si (Fig. 9). We also compared the prediction of soil texture classes by direct classification (Fig. 5) with those generated from indirect classification using the same machine-learning model, revealing completely difference between them on the lower reaches of Heihe River Basin such as the distribution of LoSa; on the middle and upper reaches of Heihe River Basin, all the prediction maps were similar, mainly distributed with SiLo.

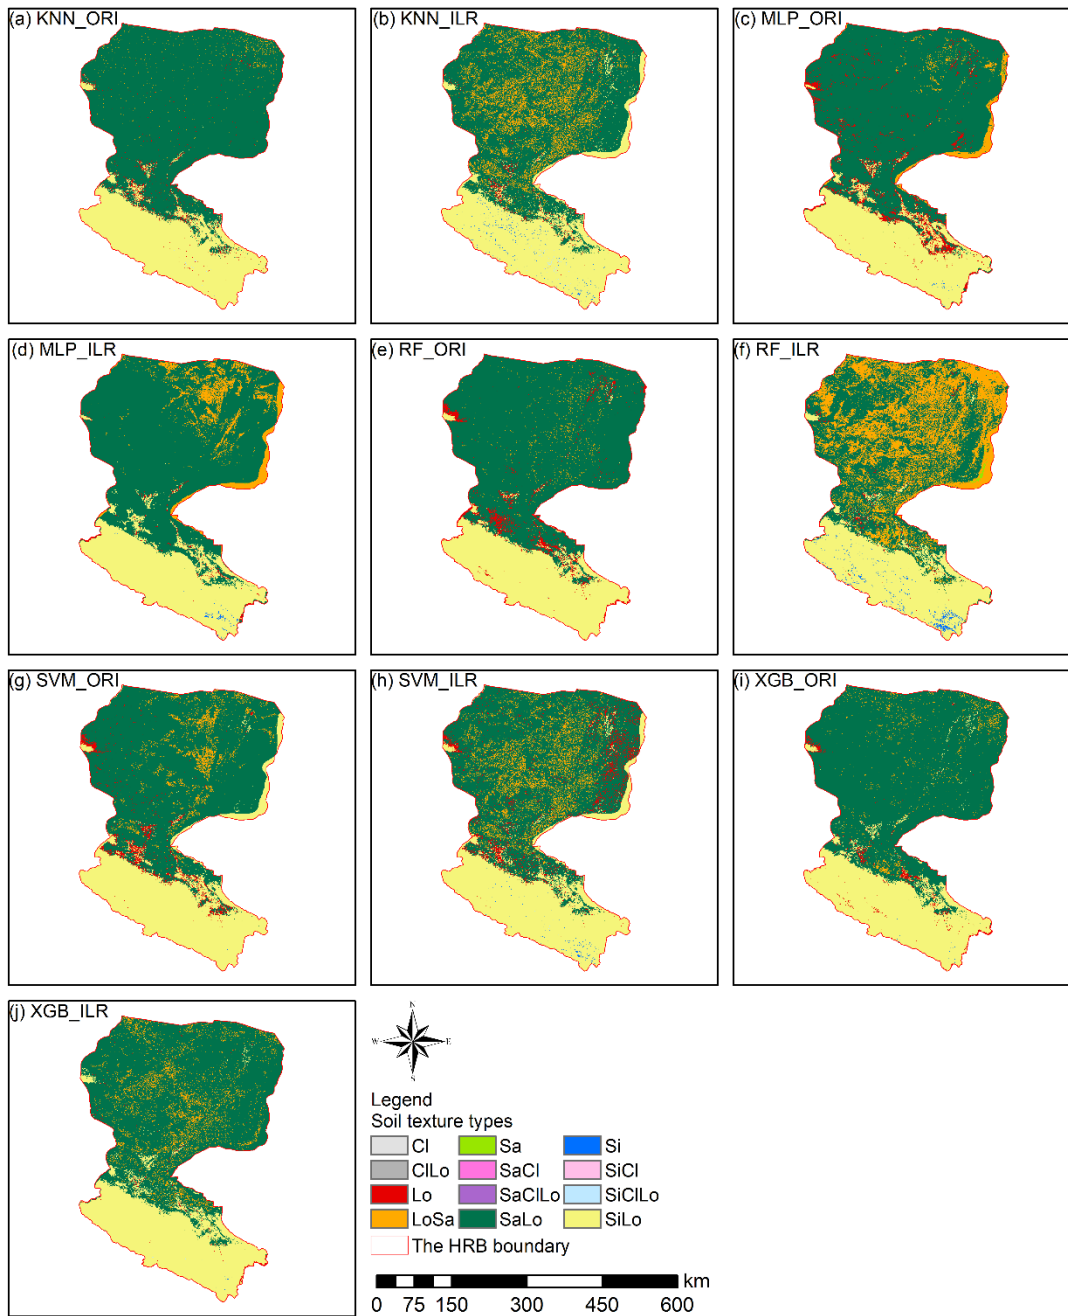

**Figure 9.** Soil texture classification prediction maps by soil PSFs interpolation ILR log ratio transformation method and the original method) of KNN, MLP, RF, SVM and XGB.

### 3.4.4 Comparison of total computing time for each model in soil texture classification and soil PSFs interpolation

Time spending for models was computed to compare the efficiency of different machine-learning models in soil texture classification and soil PSFs interpolation (Fig. 10). Because the difference in time spent among ORI and log ratio methods were similar, time spent of ILR was selected for soil PSFs interpolation. For the different models, RFs required the longest time for both classification (453.73 s) and regression (188.87 s), which may cause it to lose advantages when dealing with large data sets. KNN (classification: 4.2 s, regression: 23.6 s) and SVM (classification: 4.15 s, regression: 12.4 s) both showed shorter time in not only classification but also regression. XGB (classification: 21.6 s, regression: 17.13 s) was much more stable and used less time, and the data processes were simpler compared with MLP (classification: 47.28 s, regression: 152.31 s). Moreover, XGB delivered better performance than KNN and SVM in prediction maps of HRB, demonstrating an effective way of dealing with larger data sets.

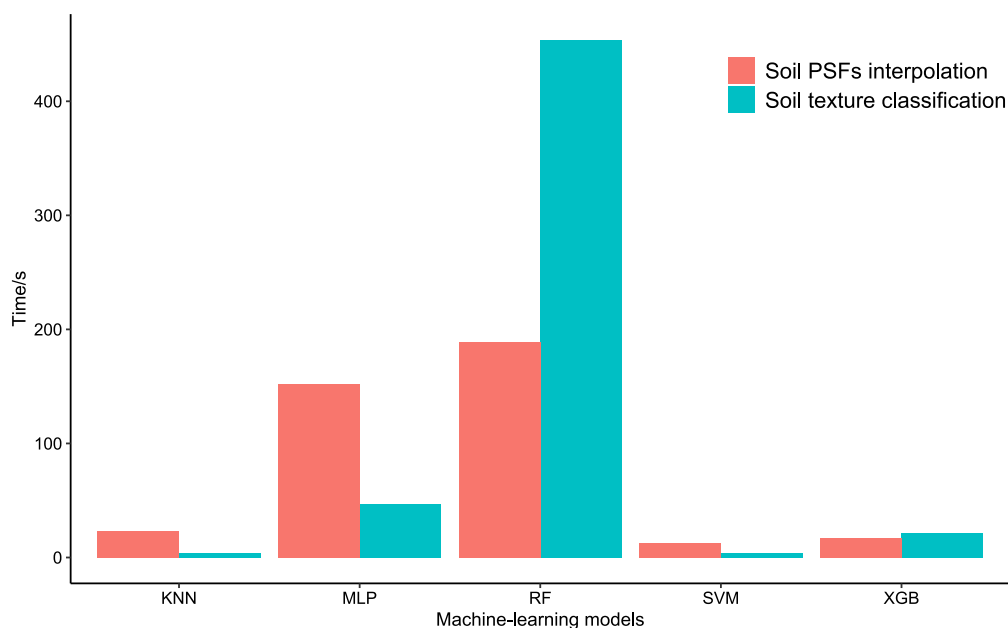

**Figure 10.** Average time spent running 30 times of KNN, MLP, RF, SVM and XGB of soil texture classification and soil PSFs interpolation.

## 4 Discussion

### 4.1 The systematic comparison of the five machine-learning models

The range of applicability of the study is limited to independent modeling, i.e., the component-wise approaches. However, joint fractions modeling could lead to different results. We found that tree-based machine-learning models – RF and XGB delivered better performance than KNN, MLP and SVM, which conclusion is the same as Heung et al. (2016). For the total computing time, RF revealed the longest time with respect to both classification and regression mode. In addition, for trade-offs of the total computing time of model and accuracy, XGB was superior to any other model, reducing the computing time significantly while maintaining the accuracy not drop too much. In fact, parallel calculations can be automatically executed during the training phase of the XGB model, presenting a great advantage in large data sets, as the XGB can be more than ten times faster than the existing gradient boosting model (Chen and Guestrin, 2016). Therefore, XGB was recommended with sub-optimal accuracy but fast at the expense of a loss in precision, which can be selected when researchers deal with large data sets and regional scale study area. Considering the precise methods, RF can deliver the most accurate results, but it takes the longest computing time. Moreover, some joint fractions approaches – compositional kriging (Wang and Shi, 2017), High Accuracy Surface Modeling (HASM) (Yue et al., 2016; Yue et al., 2015) and the Dirichlet regression (Hijazi and Jernigan, 2009) – can consider the multivariate treatment for soil PSFs using a joint model, but machine-learning methods are more convenient to combine environmental covariables. For the machine-learning methods in our study, KNN, MLP, RF and SVM can also be also applied to multivariate vectors combined with log ratio methods. For example, the Multivariate Random Forest (MRF) method, which is the extended version of RF, calculates predictions of all output features using single model (Segal and Xiao, 2011). However, not all of five machine-learning methods (e.g., XGB) can extend multiple response setting, they were therefore compared systematically at the level of independent modeling.

#### **4.2 The systematic comparison of the models combined with log ratio transformed data and original data**

Log ratio transformation methods can provide a perspective to open the “closure effect” inducing spurious correlation, which were combined with independent models to obtaining the interpolation map, then the results can be back-transformed using inverse equations. However, in the process of parameters optimization, the optimal parameters of different machine-learning methods were obtained using log ratio transformed data, which cannot guarantee the most accurate back-transformed results. This is because that the values of assessment indicators (e.g. MAEs, RMSEs, etc.) will remain stable with limited differences due to the small range of log ratio transformed data. Therefore, when the prediction values of log ratio methods were back-transformed to the real space, these values of indicators will be enlarged.

Due to the contraction of the predicted value (Fig. 8), there were small numbers of predictions beyond the range of original data value, including the negative predictions using ORI method. Though these few negative predictions can be eliminated by parameter adjustment in our study, that is still a drawback of ORI method. Among the three log ratio methods, ILR and CLR were superior to ALR, which can be explained by that ILR and CLR were isometric transformations, which could preserve distances (Filzmoser and Hron, 2009). Moreover, ALR has been criticized because the choice of the denominator is subjective, which can influence the results. In addition, slightly better performance of ILR than CLR were obtained, because in CLR, the

geometric mean composed of all compositions of soil PSFs is the denominator, and one-to-one mapping of equations and soil PSFs could be implemented. Nevertheless, the sum of the dimensions of CLR is 0, the problem of collinear is still present. ILR transformed all the information into D-1 orthogonal log contrasts (Egozcue et al. 2003) and overcame the data collinearity problem and sub-compositional incoherence of CLR by using an appropriate choice of the basis (Egozcue and Pawlowsky-Glahn, 2005). Furthermore, each component of log ratio or original soil PSFs data were independently modeled using component-wise approaches (machine-learning methods), that may be sub-optimal compared with joint fractions approach under the circumstances dealing with the multivariate treatment. For example, CLR transformed data are still characterized by collinearity because of the linear constraint of sum 0, but there is no guarantee that the sum of three components of CLR is 0 due to the use of independent modeling. Though the final predictions were not influenced (still sum to 100 %) since the inverse equations for CLR, collinear constraints reduced the prediction accuracy. By contrast, ILR method is more meaningful and appropriate than other log ratio methods and original method because it indeed removes the data constraints. This is another reason for the better performance of the machine-learning methods combining with ILR in accuracy assessment. Therefore, ILR is more recommended for component-wise modeling of machine-learning unless multivariate extensions of the methods are considered.

Another more meaningful multivariate treatment of soil PSFs using the probability density functions of soil particle size curves (PSCs) could be considered in the future, since non-negative values integrating to 1 (or 100 %) can be considered as compositional data with infinitesimal parts (so-called functional compositions) (Menafoglio et al., 2014). Unlike conventional component-wise approaches, the viewpoints of functional compositions are beneficial to acquiring complete and continuous information rather than discrete information. Soil texture and soil PSFs can be extracted from the stochastic simulation of soil PSCs (Menafoglio et al., 2016a), applying jointly to the fractions and exploiting fully the richness of information. Menafoglio et al., (2016b) applied such functional-compositional data for the stochastic simulation of PSCs based on geostatistical Monte Carlo and Bayes space approach combined with CLR transformation method in heterogeneous aquifer systems in hydrogeology, demonstrating more remarkable improvement of characterizations of the spatial variability and uncertainty compared with traditional methods.

#### 4.3 The systematic comparison of the direct and indirect soil texture classification for soil PSFs

Compared with the real soil texture distribution and environment of the HRB, SiLo overlaid the upper reaches of HRB, and SaLo and Lo were in the south of the upper reaches of HRB showed strip distribution. Moreover, an uncovered area was detected in the northwest of the lower reaches of HRB, where it cannot be predicted due to a lack of information input in the process of model training. The main soil texture classes of the lower reaches of the HRB were SiLo, LoSa and small amounts of SaLo and Lo, which distributed in the uncovered area. The main soil texture classes predicted from direct classification using machine-learning models were SaLo and SiLo; RF and XGB delivered much more LoSa than other direct classification models. However, all these models predicted that the main soil type of the lower reaches of HRB was SaLo, which was not

fitted for the real environment (LoSa). In fact, LoSa and SaLo were obviously most confused classes. However, they are fairly similar to each other (Fig.8). In addition, because of the limitation of the train sets, direct classification can only predict types which contained in train sets. In contrast, indirect classification broke such limitations, and new prediction types arose due to the transformation from soil PSFs to soil texture types. Moreover, more suitable matching performance with the real environment should be considered such as the log ratio methods of MLP and RF models, KNN\_ ALR, KNN\_ ILR and XGB\_ CLR.

## 5 Conclusion

We systematically compared a total of 45 models for direct and indirect soil texture classification, and soil PSFs interpolation using five machine-learning methods combined with original and three different log ratio transformed data in the HRB. As flexible and stable models, tree learners such as RF delivered powerful performance in both classification and regression and were superior to other machine-learning models mentioned above. As a new and sub-optimal machine-learning method in soil science, XGB appeared to be more meaningful and more computationally efficient when dealing with large data sets. RF and XGB were recommended to evaluate classification capacity of imbalanced data. In addition, the log ratio methods had advantages of modifying STRESS in soil PSFs interpolation. Moreover, the indirect soil texture classification outperformed the direct one, especially when combined with the log ratio methods. The indirect soil texture classification generated preferable results in both cases of accuracy indicators and prediction maps. More appropriate environmental covariates and interpolation techniques, more efficient soil PSFs data transformation methods, different perspectives of compositional data selection (e.g., functional compositions and multivariate treatments) and systematic parameter adjustment algorithms of compositional data are key to improving accuracy in the future.

20

*Data availability.* The 640 soil sampling data of the HRB (<http://westdc.westgis.ac.cn/DOI:10.3972/heihe.009.2013.db>; <http://westdc.westgis.ac.cn/DOI:10.3972/heihe.009.2013.db>; <http://westdc.westgis.ac.cn/DOI:10.3972/heihe.00135.2016.db>; <http://westdc.westgis.ac.cn/DOI:10.3972/hiwater.147.2013.db>; <http://westdc.westgis.ac.cn/DOI:10.3972/heihe.037.2014.db>; <http://westdc.westgis.ac.cn/DOI:doi:10.3972/heihe.0034.2013.db>; <http://westdc.westgis.ac.cn/DOI:10.3972/heihe.093.2013.db>) and part of environmental covariates data can be accessed through <http://westdc.westgis.ac.cn/> (last access: 29 October 2018). The meteorological data can be accessed through <http://data.cma.cn/> (last access: 29 October 2018).

30

*Author contributions.* WS contributed to soil data sampling, oversaw the design of the entire project. MZ performed the analysis and wrote the manuscript. Both authors contributed to writing this paper and interpreting data.

*Competing interests.* The authors declare that they have no conflict of interest.

5

*Acknowledgements.* This study was supported by the National Key Research and Development Program of China (No. 2017YFA0604703), the National Natural Science Foundation of China (Grant No. 41771111 and 41771364), Fund for Excellent Young Talents in Institute of Geographic Sciences and Natural Resources Research, Chinese Academy of Sciences (2016RC201), and the Youth Innovation Promotion Association, CAS (No. 2018071).

## 10 References

- Abdi, D., Cade-Menun, B. J., Ziadi, N., and Parent, L.-E.: Compositional statistical analysis of soil p-31-nmr forms, *Geoderma*, 257, 40-47, <https://doi.org/10.1016/j.geoderma.2015.03.019>, 2015.
- Adhikari, K., and Hartemink, A. E.: Linking soils to ecosystem services - a global review, *Geoderma*, 262, 101-111, <https://doi.org/10.1016/j.geoderma.2015.08.009>, 2016.
- 15 Aitchison, J.: The statistical-analysis of compositional data, *Journal of the Royal Statistical Society Series B-Methodological*, 44, 139-177, 1982.
- Aitchison, J.: On criteria for measures of compositional difference, *Mathematical Geology*, 24, 365-379, <https://doi.org/10.1007/bf00891269>, 1992.
- Bagheri Bodaghabadi, M., Antonio Martinez-Casasnovas, J., Salehi, M. H., Mohammadi, J., Esfandiarpour Borujeni, I.,  
20 Toomanian, N., and Gandomkar, A.: Digital soil mapping using artificial neural networks and terrain-related attributes, *Pedosphere*, 25, 580-591, [https://doi.org/10.1016/s1002-0160\(15\)30038-2](https://doi.org/10.1016/s1002-0160(15)30038-2), 2015.
- Basheer, I. A., and Hajmeer, M.: Artificial neural networks: fundamentals, computing, design, and application, *Journal of Microbiological Methods*, 43, 3-31, [https://doi.org/10.1016/S0167-7012\(00\)00201-3](https://doi.org/10.1016/S0167-7012(00)00201-3), 2000.
- Bationo, A., Kihara, J., Vanlauwe, B., Waswa, B., and Kimetu, J.: Soil organic carbon dynamics, functions and management  
25 in west african agro-ecosystems, *Agricultural Systems*, 94, 13-25, <https://doi.org/10.1016/j.agsy.2005.08.011>, 2007.
- Bedall, F. K., and Zimmermann, H.: Algorithm as 143: The mediancentre, *Journal of the Royal Statistical Society. Series C (Applied Statistics)*, 28, 325-328, 10.2307/2347218, 1979.
- Behrens, T., and Scholten, T.: Chapter 25 a comparison of data-mining techniques in predictive soil mapping, in: *Developments in soil science*, edited by: Lagacherie, P., McBratney, A. B., and Voltz, M., Elsevier, 353-617, 2006.
- 30 Bergmeir, C., and Benitez, J. M.: Neural networks in R using the stuttgart neural network simulator: RSNNS, *Journal of Statistical Software*, 46, 1-26, 2012.
- Breiman, L.: Bagging predictors, *Machine Learning*, 24, 123-140, <https://doi.org/10.1023/a:1018054314350>, 1996.

- Breiman, L.: Random forests, *Machine Learning*, 45, 5-32, <https://doi.org/10.1023/a:1010933404324>, 2001.
- Brus, D. J., Kempen, B., and Heuvelink, G. B. M.: Sampling for validation of digital soil maps, *European Journal of Soil Science*, 62, 394-407, <https://doi.org/10.1111/j.1365-2389.2011.01364.x>, 2011.
- Burges, C. J. C.: A tutorial on support vector machines for pattern recognition, *Data Mining and Knowledge Discovery*, 2, 121-167, <https://doi.org/10.1023/a:1009715923555>, 1998.
- Burrough, P. A., van Gaans, P. F. M., and Hootsmans, R.: Continuous classification in soil survey: Spatial correlation, confusion and boundaries, *Geoderma*, 77, 115-135, [https://doi.org/10.1016/S0016-7061\(97\)00018-9](https://doi.org/10.1016/S0016-7061(97)00018-9), 1997.
- Butler, J. C.: Effects of closure on the moments of a distribution, *Journal of the International Association for Mathematical Geology*, 11, 75-84, 10.1007/bf01043247, 1979.
- 10 Camera, C., Zomeni, Z., Noller, J. S., Zissimos, A. M., Christoforou, I. C., and Bruggeman, A.: A high resolution map of soil types and physical properties for cyprus: A digital soil mapping optimization, *Geoderma*, 285, 35-49, <https://doi.org/10.1016/j.geoderma.2016.09.019>, 2017.
- Chen, T., and Guestrin, C.: Xgboost: A scalable tree boosting system, *Proceedings of the 22nd ACM SIGKDD International Conference on Knowledge Discovery and Data Mining*, San Francisco, California, USA, 2016.
- 15 Chen, T., He, T., Benesty, M., Khotilovich, V., Tang, Y., Cho, H., Chen, K., Mitchell, R., Cano, I., Zhou, T., Li, M., Xie, J., Lin, M., Geng, Y., and Li, Y.: Xgboost: Extreme gradient boosting, R package version 0.71.2, available at: <https://CRAN.R-project.org/package=xgboost> (last access: 18 November 2018), 2018.
- Conrad, O., Bechtel, B., Bock, M., Dietrich, H., Fischer, E., Gerlitz, L., Wehberg, J., Wichmann, V., and Böhner, J.: System for automated geoscientific analyses (saga) v. 2.1.4, *Geosci. Model Dev.*, 8, 1991-2007, [https://doi.org/10.5194/gmd-8-](https://doi.org/10.5194/gmd-8-1991-2015)
- 20 [1991-2015](https://doi.org/10.5194/gmd-8-1991-2015), 2015.
- Cortes, C., and Vapnik, V.: Support-vector networks, *Machine Learning*, 20, 273-297, <https://doi.org/10.1023/a:1022627411411>, 1995.
- Cover, T. M., and Hart, P. E.: Nearest neighbor pattern classification, *Ieee Transactions on Information Theory*, 13, 21, <https://doi.org/10.1109/tit.1967.1053964>, 1967.
- 25 Crouvi, O., Pelletier, J. D., and Rasmussen, C.: Predicting the thickness and aeolian fraction of soils in upland watersheds of the mojave desert, *Geoderma*, 195, 94-110, <https://doi.org/10.1016/j.geoderma.2012.11.015>, 2013.
- Davis, J., and Goadrich, M.: The relationship between precision-recall and roc curves, *Proceedings of the 23rd international conference on Machine learning*, Pittsburgh, Pennsylvania, USA, 2006.
- Egozcue, J. J., Pawlowsky-Glahn, V., Mateu-Figueras, G., and Barcelo-Vidal, C.: Isometric logratio transformations for compositional data analysis, *Mathematical Geology*, 35, 279-300, <https://doi.org/10.1023/a:1023818214614>, 2003.
- 30 Egozcue, J. J., and Pawlowsky-Glahn, V.: Groups of parts and their balances in compositional data analysis, *Math. Geol.*, 37, 795-828, 10.1007/s11004-005-7381-9, 2005.
- Elith, J., Leathwick, J. R., and Hastie, T.: A working guide to boosted regression trees, *Journal of Animal Ecology*, 77, 802-813, <https://doi.org/10.1111/j.1365-2656.2008.01390.x>, 2008.



- Filzmoser, P., and Hron, K.: Correlation Analysis for Compositional Data, *Math Geosci.*, 41, 905-919, 10.1007/s11004-008-9196-y, 2009.
- Filzmoser, P., Hron, K., and Reimann, C.: Univariate statistical analysis of environmental (compositional) data: Problems and possibilities, *Science of the Total Environment*, 407, 6100-6108, <https://doi.org/10.1016/j.scitotenv.2009.08.008>, 2009.
- Follain, S., Minasny, B., McBratney, A. B., and Walter, C.: Simulation of soil thickness evolution in a complex agricultural landscape at fine spatial and temporal scales, *Geoderma*, 133, 71-86, <https://doi.org/10.1016/j.geoderma.2006.03.038>, 2006.
- Fu, G.-H., Xu, F., Zhang, B.-Y., and Yi, L.-Z.: Stable variable selection of class-imbalanced data with precision-recall criterion, *Chemometrics and Intelligent Laboratory Systems*, 171, 241-250, <https://doi.org/10.1016/j.chemolab.2017.10.015>, 2017.
- Gobin, A., Campling, P., and Feyen, J.: Soil-landscape modelling to quantify spatial variability of soil texture, *Physics and Chemistry of the Earth Part B-Hydrology Oceans and Atmosphere*, 26, 41-45, [https://doi.org/10.1016/s1464-1909\(01\)85012-7](https://doi.org/10.1016/s1464-1909(01)85012-7), 2001.
- Gochis, D. J., Vivoni, E. R., and Watts, C. J.: The impact of soil depth on land surface energy and water fluxes in the north american monsoon region, *Journal of Arid Environments*, 74, 564-571, <https://doi.org/10.1016/j.jaridenv.2009.11.002>, 2010.
- Gower, J. C.: Algorithm as 78: The mediancentre, *Journal of the Royal Statistical Society. Series C (Applied Statistics)*, 23, 466-470, 10.2307/2347150, 1974.
- Hengl, T., Heuvelink, G. B. M., Kempen, B., Leenaars, J. G. B., Walsh, M. G., Shepherd, K. D., Sila, A., MacMillan, R. A., de Jesus, J. M., Tamene, L., and Tondoh, J. E.: Mapping soil properties of africa at 250 m resolution: Random forests significantly improve current predictions, *Plos One*, 10, <https://doi.org/10.1371/journal.pone.0125814>, 2015.
- Hengl, T., de Jesus, J. M., Heuvelink, G. B. M., Gonzalez, M. R., Kilibarda, M., Blagotic, A., Shangguan, W., Wright, M. N., Geng, X., Bauer-Marschallinger, B., Guevara, M. A., Vargas, R., MacMillan, R. A., Batjes, N. H., Leenaars, J. G. B., Ribeiro, E., Wheeler, I., Mantel, S., and Kempen, B.: Soilgrids250m: Global gridded soil information based on machine learning, *Plos One*, 12, <https://doi.org/10.1371/journal.pone.0169748>, 2017.
- Hengl, T., Nussbaum, M., Wright, M. N., Heuvelink, G. B. M., and Graler, B.: Random forest as a generic framework for predictive modeling of spatial and spatio-temporal variables, *PeerJ*, 6, 49, 10.7717/peerj.5518, 2018.
- Heung, B., Ho, H. C., Zhang, J., Knudby, A., Bulmer, C. E., and Schmidt, M. G.: An overview and comparison of machine-learning techniques for classification purposes in digital soil mapping, *Geoderma*, 265, 62-77, <https://doi.org/10.1016/j.geoderma.2015.11.014>, 2016.
- Hijazi, R., and Jernigan, R.: Modelling compositional data using Dirichlet regression models, *Journal of Applied Probability and Statistics*, 4, 77-91, 2009.

- Huang, J., Subasinghe, R., and Triantafyllis, J.: Mapping particle-size fractions as a composition using additive log-ratio transformation and ancillary data, *Soil Science Society of America Journal*, 78, 1967-1976, <https://doi.org/10.2136/sssaj2014.05.0215>, 2014.
- 5 Huete, A., Didan, K., Miura, T., Rodriguez, E. P., Gao, X., and Ferreira, L. G.: Overview of the radiometric and biophysical performance of the modis vegetation indices, *Remote Sensing of Environment*, 83, 195-213, [https://doi.org/10.1016/s0034-4257\(02\)00096-2](https://doi.org/10.1016/s0034-4257(02)00096-2), 2002.
- Huete, A. R.: A soil-adjusted vegetation index (savi), *Remote Sensing of Environment*, 25, 295-309, [https://doi.org/10.1016/0034-4257\(88\)90106-x](https://doi.org/10.1016/0034-4257(88)90106-x), 1988.
- 10 Jafari, A., Khademi, H., Finke, P. A., Van de Wauw, J., and Ayoubi, S.: Spatial prediction of soil great groups by boosted regression trees using a limited point dataset in an arid region, southeastern iran, *Geoderma*, 232, 148-163, <https://doi.org/10.1016/j.geoderma.2014.04.029>, 2014.
- Kuhn, M.: Caret: Classification and regression training, R package version 6.0-80, available at: <https://CRAN.R-project.org/package=caret> (last access: 18 November 2018), 2018.
- 15 Landis, J. R., and Koch, G. G.: Measurement of observer agreement for categorical data, *Biometrics*, 33, 159-174, <https://doi.org/10.2307/2529310>, 1977.
- Liaw, A., and Wiener, M.: Classification and regression by randomforest, *R News*, 2, 18-22, 2002.
- Liess, M., Glaser, B., and Huwe, B.: Uncertainty in the spatial prediction of soil texture comparison of regression tree and random forest models, *Geoderma*, 170, 70-79, <https://doi.org/10.1016/j.geoderma.2011.10.010>, 2012.
- 20 Martin-Fernandez, J. A., Olea-Meneses, R. A., and Pawlowsky-Glahn, V.: Criteria to compare estimation methods of regionalized compositions, *Mathematical Geology*, 33, 889-909, <https://doi.org/10.1023/a:1012293922142>, 2001.
- McNamara, J. P., Chandler, D., Seyfried, M., and Achet, S.: Soil moisture states, lateral flow, and streamflow generation in a semi-arid, snowmelt-driven catchment, *Hydrological Processes*, 19, 4023-4038, <https://doi.org/10.1002/hyp.5869>, 2005.
- 25 Menafoglio, A., Guadagnini, A., and Secchi, P.: A kriging approach based on aitchison geometry for the characterization of particle-size curves in heterogeneous aquifers, *Stoch. Environ. Res. Risk Assess.*, 28, 1835-1851, <https://doi.org/10.1007/s00477-014-0849-8>, 2014.
- Menafoglio, A., Guadagnini, A., and Secchi, P.: Stochastic simulation of soil particle-size curves in heterogeneous aquifer systems through a bayes space approach, *Water Resources Research*, 52, 5708-5726, [10.1002/2015wr018369](https://doi.org/10.1002/2015wr018369), 2016b.
- 30 Menafoglio, A., Secchi, P., and Guadagnini, A.: A class-kriging predictor for functional compositions with application to particle-size curves in heterogeneous aquifers, *Math Geosci.*, 48, 463-485, <https://doi.org/10.1007/s11004-015-9625-7>, 2016a.
- Metternicht, G. I., and Zinck, J. A.: Remote sensing of soil salinity: Potentials and constraints, *Remote Sensing of Environment*, 85, 1-20, [https://doi.org/10.1016/s0034-4257\(02\)00188-8](https://doi.org/10.1016/s0034-4257(02)00188-8), 2003.

- Meyer, D., Dimitriadou, E., Hornik, K., Andreas, W., and Friedrich, L.: E1071: Misc functions of the department of statistics, probability theory group (formerly: E1071), tu wien, R package version 1.6-8, available at: <https://CRAN.R-project.org/package=e1071> (last access: 18 November 2018), 2017.
- 5 Pahlavan-Rad, M. R., and Akbarimoghaddam, A.: Spatial variability of soil texture fractions and ph in a flood plain (case study from eastern iran), *Catena*, 160, 275-281, <https://doi.org/10.1016/j.catena.2017.10.002>, 2018.
- Poggio, L., and Gimona, A.: 3d mapping of soil texture in scotland, *Geoderma Regional*, 9, 5-16, <https://doi.org/10.1016/j.geodrs.2016.11.003>, 2017.
- Reimann, C., and Filzmoser, P.: Normal and lognormal data distribution in geochemistry: Death of a myth. Consequences for the statistical treatment of geochemical and environmental data, *Environmental Geology*, 39, 1001-1014, <https://doi.org/10.1007/s002549900081>, 2000
- 10 Saito, T., and Rehmsmeier, M.: Precrec: Fast and accurate precision-recall and roc curve calculations in r, *Bioinformatics*, 33, 145-147, <https://doi.org/10.1093/bioinformatics/btw570>, 2017.
- Salazar, E., Giraldo, R., and Porcu, E.: Spatial prediction for infinite-dimensional compositional data, *Stochastic Environmental Research and Risk Assessment*, 29, 1737-1749, <https://doi.org/10.1007/s00477-014-1010-4>, 2015.
- 15 Schliep, K., and Hechenbichler, K.: Kknn: Weighted k-nearest neighbors, R package version 1.3.1, available at: <https://CRAN.R-project.org/package=kknn> (last access: 18 November 2018), 2016.
- [Segal, M., and Xiao, Y. Y.: Multivariate random forests. \*Wiley Interdisciplinary Reviews-Data Mining and Knowledge Discovery\*, 1, 80-87, <https://doi.org/10.1002/widm.12>, 2011.](#)
- Small, C. G.: A survey of multidimensional medians, *International Statistical Review*, 58, 263-277, 10.2307/1403809, 1990.
- 20 Song, X.-D., Brus, D. J., Liu, F., Li, D.-C., Zhao, Y.-G., Yang, J.-L., and Zhang, G.-L.: Mapping soil organic carbon content by geographically weighted regression: A case study in the heihe river basin, china, *Geoderma*, 261, 11-22, <https://doi.org/10.1016/j.geoderma.2015.06.024>, 2016.
- Streiner, D. L.: Maintaining standards: Differences between the standard deviation and standard error, and when to use each, *Canadian Journal of Psychiatry-Revue Canadienne De Psychiatrie*, 41, 498-502, 10.1177/070674379604100805, 1996.
- 25 Subasi, A.: Eeg signal classification using wavelet feature extraction and a mixture of expert model, *Expert Systems with Applications*, 32, 1084-1093, <https://doi.org/10.1016/j.eswa.2006.02.005>, 2007.
- Taalab, K., Corstanje, R., Zawadzka, J., Mayr, T., Whelan, M. J., Hannam, J. A., and Creamer, R.: On the application of bayesian networks in digital soil mapping, *Geoderma*, 259, 134-148, <https://doi.org/10.1016/j.geoderma.2015.05.014>, 2015.
- 30 Taghizadeh-Mehrjardi, R., Nabiollahi, K., Minasny, B., and Triantafyllis, J.: Comparing data mining classifiers to predict spatial distribution of usda-family soil groups in baneh region, iran, *Geoderma*, 253, 67-77, <https://doi.org/10.1016/j.geoderma.2015.04.008>, 2015.
- Thompson, J. A., Roecker, S., Grunwald, S., and Owens, P. R.: Chapter 21 - digital soil mapping: Interactions with and applications for hydrogeology, in: *Hydrogeology*, edited by: Lin, H., Academic Press, Boston, 665-709, 2012.

- Tolosana-Delgado, R., Mueller, U., and van den Boogaart, K. G.: Geostatistics for Compositional Data: An Overview, *Math Geosci.*, 51, 485-526, [10.1007/s11004-018-9769-3](https://doi.org/10.1007/s11004-018-9769-3), 2019.
- van den Boogaart, K. G., and Tolosana-Delgado, R.: "Compositions": A unified r package to analyze compositional data, *Computers & Geosciences*, 34, 320-338, <https://doi.org/10.1016/j.cageo.2006.11.017>, 2008.
- 5 Vapnik, V.: The support vector method of function estimation, *Nonlinear modeling: Advanced black-box techniques*, edited by: Suykens, J. A. K., and Vandewalle, J., 55-85 pp., 1998.
- Wang, Z., and Shi, W.: Mapping soil particle-size fractions: A comparison of compositional kriging and log-ratio kriging, *Journal of Hydrology*, 546, 526-541, <https://doi.org/10.1016/j.jhydrol.2017.01.029>, 2017.
- Wang, Z., and Shi, W.: Robust variogram estimation combined with isometric log-ratio transformation for improved  
 10 accuracy of soil particle-size fraction mapping, *Geoderma*, 324, 56-66, <https://doi.org/10.1016/j.geoderma.2018.03.007>, 2018.
- Wu, B., Yan, N., Xiong, J., Bastiaanssen, W. G. M., Zhu, W., and Stein, A.: Validation of etwatch using field measurements at diverse landscapes: A case study in hai basin of china, *Journal of Hydrology*, 436, 67-80, <https://doi.org/10.1016/j.jhydrol.2012.02.043>, 2012.
- 15 Wu, W., Li, A.-D., He, X.-H., Ma, R., Liu, H.-B., and Lv, J.-K.: A comparison of support vector machines, artificial neural network and classification tree for identifying soil texture classes in southwest china, *Computers and Electronics in Agriculture*, 144, 86-93, <https://doi.org/10.1016/j.compag.2017.11.037>, 2018.
- Yang, R.-M., Zhang, G.-L., Liu, F., Lu, Y.-Y., Yang, F., Yang, F., Yang, M., Zhao, Y.-G., and Li, D.-C.: Comparison of boosted regression tree and random forest models for mapping topsoil organic carbon concentration in an alpine  
 20 ecosystem, *Ecological Indicators*, 60, 870-878, <https://doi.org/10.1016/j.ecolind.2015.08.036>, 2016.
- Yi, C., Li, D., Zhang, G., Zhao, Y., Yang, J., Liu, F., and Song, X.: Criteria for partition of soil thickness and case studies, *Acta Pedologica Sinica*, 52, 220-227, 2015.
- Yoo, K., Amundson, R., Heimsath, A. M., and Dietrich, W. E.: Spatial patterns of soil organic carbon on hillslopes: Integrating geomorphic processes and the biological c cycle, *Geoderma*, 130, 47-65, <https://doi.org/10.1016/j.geoderma.2005.01.008>, 2006.
- 25 <https://doi.org/10.1016/j.jhydrol.2012.02.043>, 2012.
- [Yue, T.-X., Zhang, L.-L., Zhao, N., Zhao, M.-W., Chen, C.-F., Du, Z.-P., Song, D.-J., Fan, Z.-M., Shi, W.-J., Wang, S.-H., Yan, C.-Q., Li, Q.-Q., Sun, X.-F., Yang, H., Wilson, J., and Xu, B.: A review of recent developments in HASM, \*Environmental Earth Sciences\*, 74, 6541-6549, <https://doi.org/10.1007/s12665-015-4489-1>, 2015.](https://doi.org/10.1016/j.jhydrol.2012.02.043)
- [Yue, T., Liu, Y., Zhao, M., Du, Z., and Zhao, N.: A fundamental theorem of Earth's surface modelling, \*Environmental Earth Sciences\*, 75, 751, <https://doi.org/10.1007/s12665-016-5310-5>, 2016.](https://doi.org/10.1016/j.jhydrol.2012.02.043)
- 30 Zeraatpisheh, M., Ayoubi, S., Jafari, A., and Finke, P.: Comparing the efficiency of digital and conventional soil mapping to predict soil types in a semi-arid region in iran, *Geomorphology*, 285, 186-204, <https://doi.org/10.1016/j.geomorph.2017.02.015>, 2017.

- Zhang, S.-w., Shen, C.-y., Chen, X.-y., Ye, H.-c., Huang, Y.-f., and Lai, S.: Spatial interpolation of soil texture using compositional kriging and regression kriging with consideration of the characteristics of compositional data and environment variables, *Journal of Integrative Agriculture*, 12, 1673-1683, [https://doi.org/10.1016/s2095-3119\(13\)60395-0](https://doi.org/10.1016/s2095-3119(13)60395-0), 2013.
- 5 Zhang, X., Liu, H., Zhang, X., Yu, S., Dou, X., Xie, Y., and Wang, N.: Allocate soil individuals to soil classes with topsoil spectral characteristics and decision trees, *Geoderma*, 320, 12-22, <https://doi.org/10.1016/j.geoderma.2018.01.023>, 2018.
